1 **Sex-specific transgenerational plasticity in threespined sticklebacks**

2

3 Jennifer K Hellmann <sup>1\*</sup>, Syed Abbas Bukhari <sup>1</sup>, Jack Deno <sup>1</sup>, Alison M Bell <sup>1,2,3</sup>

4

5 <sup>1</sup>Department of Evolution, Ecology and Behavior, School of Integrative Biology, University of  
6 Illinois Urbana-Champaign, Urbana, Illinois, USA, 61801

7 <sup>2</sup>Carl R. Woese Institute for Genomic Biology, University of Illinois Urbana-Champaign,  
8 Urbana, Illinois, USA, 61801

9 <sup>3</sup>Program in Ecology, Evolution and Conservation, University of Illinois Urbana-Champaign,  
10 Urbana, Illinois, USA, 61801

11

12 \*Corresponding author: Jennifer Hellmann, 505 S Goodwin Ave, Urbana IL 61801, 215-527-  
13 3572, [hellmann@illinois.edu](mailto:hellmann@illinois.edu)

14

15

16 **Abstract (250 words)**

17 Sex-specific selection pressures can generate different phenotypic optima for males and  
18 females in response to the current environment, i.e. sex differences in phenotypic plasticity. Less  
19 widely appreciated is the possibility that transgenerational plasticity (TGP) can also depend on  
20 sex. Sex-specific TGP is potentially of great evolutionary significance, as it is a mechanism by  
21 which mothers and fathers can exert different effects on offspring traits and by which potentially  
22 adaptive traits can persist selectively across generations via only daughters or sons. Here, we  
23 demonstrate that maternally- and paternally-mediated TGP in response to predation risk have  
24 largely distinct effects on offspring traits in threespined sticklebacks (*Gasterosteus aculeatus*).  
25 Predator-exposed fathers produced sons that were more risk-prone, while predator-exposed  
26 mothers produced more anxious sons and daughters. Further, when combined together, maternal  
27 and paternal environments on offspring survival were nonadditive. Such sex-specific effects  
28 could occur if predation risk causes mothers and fathers to activate different developmental  
29 programs in sons versus daughters. Consistent with this hypothesis, offspring brain gene  
30 expression profile depended on whether their mother and/or father had been exposed to risk, and  
31 the influence of maternal and paternal environments varied between male and female offspring.  
32 Altogether these results draw attention to the potential for sex to influence patterns of TGP, and  
33 raise new questions about the evolution of plasticity at the interface between sexual conflict and  
34 parent-offspring conflict, with paternal strategies, maternal strategies, and offspring counter-  
35 adaptations all ultimately dictating offspring phenotypes.

36

37 **Key words:** maternal effect, paternal effect, *Gasterosteus aculeatus*, phenotypic plasticity,  
38 intergenerational plasticity, nongenetic inheritance

39 **Significance**

40 TGP helps organisms cope with environmental change by bridging the gap between  
41 within-generational plasticity and long-term evolutionary change. Sex-specific TGP may allow  
42 mothers and fathers to selectively alter the phenotypes of their sons and daughters in response to  
43 the environment with a greater degree of precision than genetic inheritance and in ways that  
44 match the distinct life-history strategies of males and females. By isolating cues coming from  
45 mothers versus fathers and separately evaluating phenotypic effects in sons versus daughters, we  
46 show that interactions between maternal cues, paternal cues, and offspring sex are integral to  
47 understanding when and how the past environment influences future phenotypes, and the  
48 conditions that favor the evolution of TGP.

49

## 50 **Introduction**

51           Sex differences in life-histories (e.g. reproductive lifespan, mortality rate) or reproductive  
52 strategies can favor different optimal phenotypes in males and females (1). Although a shared  
53 genetic basis can constrain phenotypic differences between the sexes (2, 3), epigenetic changes  
54 can overcome this constraint and allow males and females to respond differently to the same  
55 environmental condition (within-generational plasticity). Sex-specific patterns of within-  
56 generational plasticity have been documented in diverse taxa (4-7); for example, in cichlids,  
57 predation risk experienced early in life influenced the development of males, but not females,  
58 likely because males are more vulnerable to predation (5).

59           While less explored, there also is evidence for sex-specific *transgenerational* plasticity  
60 (TGP; also referred to as intergenerational plasticity); specifically, that the sex of the parent  
61 and/or the offspring can alter the ways in which environments encountered by recent ancestors  
62 affect future generations. For example, maternal versus paternal exposure to the same  
63 environmental condition can have different effects on offspring (8-10) and the influence of  
64 parental cues (whether mediated by the mother or the father) often depends on the sex of the  
65 offspring (11-17). Despite the biological reality that they probably often co-occur, we know little  
66 about the potential for interactions between maternal cues, paternal cues, and offspring sex  
67 during TGP because they are typically studied in isolation of each other. However, the influence  
68 of maternal cues might depend on paternal cues (or vice versa) (9, 18), and/or offspring might  
69 selectively respond to information from one parent over the other (e.g., daughters respond to  
70 maternal cues while sons respond to paternal cues).

71           Understanding the ways in which the maternal cues, paternal cues, and offspring sex  
72 interact during TGP could help clarify evolutionary phenomena such as sexual conflict, parent-

73 offspring conflict, and genomic imprinting, which is thought to arise from sexual conflict over  
74 resource allocation to offspring. For example, sexual conflict may cause mothers and fathers to  
75 favor different phenotypes in their offspring, resulting in the evolution of mechanisms that allow  
76 mothers to manipulate the ways in which fathers influence offspring (e.g. via cytoplasmic  
77 contributions (19)) or fathers to manipulate the ways in which mothers influence offspring (e.g.  
78 via ejaculate composition (20)). Further, nongenetic inheritance that functions in a sex-specific  
79 manner can resolve evolutionary conflicts that occur when selection favors different phenotypes  
80 in sons and daughters (21) because male versus female offspring may integrate parental  
81 information in ways that match their distinct life history trajectories. One way that such sex-  
82 specific inheritance could operate is if cues from mothers and fathers activate different  
83 developmental programs in daughters and sons.

84         Here, we evaluate sex-specific TGP in threespined sticklebacks (*Gasterosteus aculeatus*).  
85 Male and female sticklebacks are sexually dimorphic in several respects, including in habitat use  
86 (22), diet (23), parasite load (23), and morphology (24), with these differences beginning to  
87 emerge during early adulthood (22, 23). Sticklebacks also have a variety of male-specific  
88 reproductive traits that increase male vulnerability to predation risk (25, 26): male sticklebacks  
89 develop bright nuptial coloration, engage in conspicuous territory defense and courtship  
90 behavior, and are the sole providers of paternal care that is necessary for offspring survival (27).  
91 These sex differences in behavior and life history often expose males and females to different  
92 predation regimes (28), likely altering the environment experienced by mothers versus fathers  
93 and the optimal phenotype for daughters versus sons in response to predation risk.

94         We exposed adult male and female sticklebacks to simulated predation risk prior to  
95 fertilization and used a fully factorial design to generate offspring of control (unexposed)

96 parents, offspring of predator-exposed mothers, offspring of predator-exposed fathers, and  
97 offspring of predator-exposed mothers and fathers. Because predation risk varies in both space  
98 and time, it is likely that there is a mix of reproductively mature males and females who either  
99 have or have not recently experienced predation risk within natural populations. We reared  
100 offspring under ‘control’ conditions (i.e. in the absence of predation risk) and then compared  
101 traits relevant to predator defense between sons and daughters, including survival against live  
102 predators, and used brain gene expression data to gain insights into the underlying mechanisms.

103

## 104 **Results**

### 105 *Sons, but not daughters, of predator-exposed fathers were more risk-prone*

106 We compared maternal and paternal exposure to predation risk on the risk-taking  
107 behavior of sons and daughters. We used an open field assay to measure offspring  
108 activity/exploration and boldness under baseline conditions and after a simulated predator attack.  
109 Offspring were significantly less active/exploratory after the simulated predator attack compared  
110 to before (principal component analysis: higher values indicate more active and explorative  
111 individuals; MCMC GLMM: 95% CI (-1.24, -0.70),  $p < 0.001$ ), confirming that offspring  
112 behaviorally responded to personally-experienced risk. There was a significant interaction  
113 between paternal treatment and offspring sex on offspring activity/exploration (pooled before  
114 and after the simulated predator attack: 95% CI (0.25, 1.54),  $p = 0.005$ ; Figure 1A). Specifically,  
115 sons of predator-exposed fathers were significantly more active/exploratory compared to sons of  
116 control fathers (95% CI (-1.30, -0.20),  $p = 0.01$ ), but there was not a detectable effect of paternal  
117 treatment on female offspring (95% CI (-0.40, 0.81),  $p = 0.49$ ). This suggests that sons were  
118 especially responsive to paternal exposure to predation risk. Greater activity in response to

119 exposure to predation risk is consistent with higher risk-taking behavior observed in sticklebacks  
120 from high predation populations compared to low predation populations (29).

121 We did not detect a significant effect of maternal or paternal treatment on boldness  
122 (principal component analysis: higher values indicate less bold fish with an increased latency to  
123 emerge from the shelter and to resume movement after the predator attack), although female  
124 offspring were less bold than male offspring (SI Appendix Table S1). We found no significant  
125 effect of maternal or paternal predation exposure on offspring standard length or body mass at  
126 4.5 months, nor did they vary between male and female offspring; however, larger fish were less  
127 active/exploratory and less bold (SI Appendix Table S1).

128

129 ***Offspring of predator-exposed mothers, but not fathers, were more cautious***

130 Scototaxis – preference for dark – is often associated with increased cautiousness, or  
131 anxiety-like behavior (30). In order to determine whether a parent’s experience with predation  
132 risk influences the anxiety-like behavior of their offspring (31), we conducted light-dark  
133 preference tests in a half-black/half-white tank. Offspring of predator-exposed mothers were  
134 more cautious (principal component analysis: took longer to enter the white area, spent less time  
135 in the white area, and switched less between black and white areas) compared to offspring of  
136 control mothers (MCMC GLMM: 95% CI [0.06, 1.09],  $p=0.03$ ; Figure 1B). However, we did not  
137 detect an effect of paternal treatment on offspring scototaxis behavior (95% CI [-0.79, 0.32],  
138  $p=0.44$ ). Both female (95% CI [-1.27, -0.17],  $p=0.01$ ) and smaller (95% CI [-0.10, -0.006],  
139  $p=0.03$ ) offspring showed more cautious behavior. We found no evidence of seasonal effects  
140 (experimental day: 95% CI [-0.004, 0.01],  $p=0.33$ ).

141

142 ***Mothers mitigated the fitness costs of paternal exposure to predation risk***

143 To understand if parents' experience with predation risk altered offspring survival in an  
144 encounter with a predator (reviewed in (32)), we measured offspring survival against live sculpin  
145 predators as well as offspring response to an acute stressor (confinement stress). There was a  
146 significant interaction between maternal and paternal treatment on offspring survival in live  
147 predation assays (generalized linear mixed effect model:  $Z_{335} = -1.98, 0.047$ ). Specifically,  
148 offspring of predator-exposed fathers were more frequently captured by the predator compared to  
149 offspring of control parents, but this was not true for offspring of predator-exposed mothers or  
150 both a predator-exposed mother and father (Figure 1C). This suggests that was a strong fitness  
151 cost of having a predator-exposed father, but mothers seemed to mitigate those costs, perhaps by  
152 making their offspring more cautious (see above). Survivors of the successful predation trials  
153 were heavily female biased (93/148; Chi-squared:  $\chi^2=9.76, p=0.002$ ), suggesting that males are  
154 generally more vulnerable to predation risk. The sex-bias was not significantly different across  
155 treatment groups ( $\chi^2=3.03, p=0.39$ ). We found no effect of size on how frequently the  
156 stickleback were captured by the predator ( $Z_{335} = 1.56, 0.11$ ). Further, we did not find evidence  
157 that parental treatment significantly altered offspring stress response (opercular beat rate),  
158 although lower opercular beat rate tended to be correlated with reduced likelihood of survival in  
159 the predation assays (SI Appendix).

160

161 ***Distinct and nonadditive effects of maternal and paternal treatment on offspring brain gene***  
162 ***expression***

163 The results described above suggest that predation risk experienced by mothers versus  
164 fathers has very different consequences for offspring development. In order to evaluate this



165 question at the molecular level, we used pair-wise contrasts to compare the baseline brain gene  
166 expression profile of offspring of unexposed parents (control) to offspring of predator-exposed  
167 mothers, predator-exposed fathers, and two predator-exposed parents in male and female  
168 offspring separately. We found that the effects of maternal and paternal treatment on brain gene  
169 expression were approximately equivalent in magnitude and were largely nonoverlapping  
170 (Figure 2A,B): in sons, for example, 1028 genes were differentially expressed in response to  
171 maternal experience with risk, 904 genes were differentially expressed in response to paternal  
172 experience with risk while only 253 genes were shared between them (daughters show a similar  
173 pattern, Figure 2A). Interestingly, there was also a large number of genes that were unique to the  
174 “both” condition, i.e. between offspring of two predator-exposed parents versus the control;  
175 these differentially expressed genes could reflect the ways in which maternal and paternal cues  
176 interact at the molecular level.

177       Of the differentially expressed genes that were shared between the pairwise comparisons,  
178 nearly all were concordantly regulated, for both sons and daughters (Figure 2A,B). This suggests  
179 that, despite the large-scale differences in brain gene expression between offspring of predator-  
180 exposed mothers and fathers, there is a core set of genes that is activated in offspring brains in  
181 response to either maternal or paternal exposure to predation risk.

182

183 ***Maternal and paternal exposure to predation risk interacted with offspring sex to influence***  
184 ***offspring brain gene expression***

185       The behavioral data suggest that sons and daughters respond to parental experience with  
186 predation risk differently, with sons, but not daughters, increasing activity/exploration in  
187 response to paternal experience with predation risk. One way that such sex-specific inheritance

188 could arise is if cues from one parent (e.g. fathers) activate a particular developmental program  
189 in one offspring sex but not the other (e.g. in sons but not daughters).

190 To test this hypothesis, we used WGCNA to identify clusters (“modules”) of genes with  
191 similar expression patterns. This procedure reduces the dimensionality of the transcriptomic  
192 dataset, which allowed us to explore the potential for interactive effects of maternal treatment,  
193 paternal treatment and offspring sex on modules of genes with correlated expression patterns.  
194 WGCNA identified 23 informative modules (or clusters of genes with coordinated expression) in  
195 the dataset. The expression of eight of the 23 modules was significantly affected by at least one  
196 of the factors in the model: three modules were significantly affected by maternal treatment, two  
197 were significantly affected by the two-way interaction between maternal and paternal treatment,  
198 and three were significantly affected by the three-way interaction between paternal treatment,  
199 maternal treatment and offspring sex (shown in Figure 2C). For example, the module “saddle  
200 brown” comprises 48 co-expressed genes (largely enriched for developmental processes) whose  
201 expression was influenced by the three way interaction between maternal treatment, paternal  
202 treatment and offspring sex. Specifically, daughters of predator-exposed mothers or fathers  
203 showed lower expression of genes in this module compared to daughters of control parents or  
204 two predator-exposed parents (Figure 2C). For sons, on the other hand, the expression of genes  
205 in this module was more strongly affected by maternal treatment. A similar pattern was observed  
206 in the yellow and cyan modules. Overall these results demonstrate that at the molecular level,  
207 daughters and sons differ in the extent to which they respond to predation risk that had been  
208 experienced by their mother, father or by both parents.

209

210 **Discussion**

211 Transgenerational plasticity allows environmental information to be delivered to  
212 offspring earlier and with potentially lower costs to offspring than developmental plasticity,  
213 which may allow offspring to develop traits during early development that help them cope with  
214 environmental change (33, 34). Unlike genetic inheritance, TGP can potentially be fine-tuned to  
215 the precise environment that offspring will encounter (21). In particular, males and females often  
216 experience different environments because of sex differences in life history and reproductive  
217 strategies, and TGP might allow parents to confer different phenotypes to sons and daughters.  
218 The results reported here draw attention to the importance of sex-specific TGP: offspring  
219 phenotypes varied depending on whether predation risk had been experienced by their mother or  
220 their father, and a parent's experience with predation risk produced different phenotypes in their  
221 sons compared to their daughters.

222 We find that maternal and paternal exposure to the same environmental factor (predation  
223 risk) generated largely distinct effects in offspring: predator-exposed mothers produced more  
224 cautious offspring (scototaxis), while predator-exposed fathers produced sons, but not daughters,  
225 that were more risk prone (more active and exploratory in open field assays). Different effects of  
226 maternal and paternal treatment on offspring could reflect the different proximate mechanisms  
227 that mediate the transmission of cues from mothers versus fathers to offspring (e.g., eggs versus  
228 sperm) and/or parent-of-origin effects (35). They might also reflect differences between mothers  
229 and fathers in their ability to detect and/or respond to environmental conditions. From an  
230 ultimate perspective, divergent maternal and paternal effects may have evolved in response to  
231 sexual conflict, with mothers and fathers favoring different optimal offspring phenotypes (36).

232 There were non-additive interactions between the maternal and paternal environment on  
233 some (survival, gene expression), but not all (scototaxis, open field behavior) offspring traits. In

234 particular, offspring of predator-exposed fathers had reduced survival against a live predator;  
235 however, offspring of two predator-exposed parents did not have reduced survival, suggesting  
236 that maternal predation exposure may mitigate the deleterious effects of paternal predation  
237 exposure to some degree. Despite the fact that maternal cues seemingly over-rode the effect of  
238 paternal cues on survival, we did not find evidence that maternal cues were necessarily more  
239 dominant at the molecular level, as comparable numbers of genes were differentially expressed  
240 in response to maternal versus paternal treatment. Moreover, the brain gene expression profile of  
241 offspring of two predator-exposed parents did not more closely resemble the gene expression  
242 profile of offspring of predator-exposed mothers. Instead, our results are more consistent with  
243 the hypothesis that non-additive interactions between the environments experienced by mothers  
244 and fathers produce a distinct neurogenomic profile. These interactive effects could arise due to  
245 epigenetic mechanisms such as parent-of-origin effects (37) or because paternal cues via sperm  
246 are mediated by maternal contribution to cytoplasm in the developing embryo (19).

247 In addition to interactions between the maternal and paternal environment, we found  
248 strong evidence that sons and daughters differ in their phenotypic response to maternal and  
249 paternal exposure to predation risk. These sex-specific patterns emerged in our study well before  
250 offspring were reproductively mature, during a period in their life when males and females are  
251 shoaling and still occupying similar habitats (27). Interestingly, these sex-specific patterns of  
252 transgenerational plasticity did not seem to emerge along a consistent male-female divide (e.g.  
253 sons attend to their father and daughters attend to their mother); instead, sons and daughters were  
254 altered by paternal and maternal environments at a relatively similar magnitude, but in different  
255 ways. These sex-specific effects may result from differences in sons and daughters in their  
256 susceptibility to parental stress (38, 39) or may evolve due to parent-offspring conflict, in which

257 sons and daughters have different capacities to respond to or ignore information from fathers and  
258 mothers. It is also possible that sex-specific responses are adaptive for offspring, with differences  
259 organizing in early development to allow offspring to develop phenotypes that are better  
260 matched to the different environments they will encounter later in life. For example, it is possible  
261 that increased risk-prone behavior for sons, but not daughters, may be adaptive because high  
262 variance in male reproductive success favors males that adopt high risk, high reward behaviors to  
263 increase growth and access to resources under high predation pressure (29). Our study shows that  
264 maternal and paternal predation exposure can have fitness consequences for offspring (i.e., via  
265 survival) in the lab; work is needed in a more natural context in the field to assess whether these  
266 parental cues have adaptive or maladaptive consequences.

267         Interactions between the parental environment and offspring sex could be mediated via a  
268 variety of proximate mechanisms. The interactive effects in the gene expression data were not  
269 restricted to genes located on the nascent sex chromosomes (SI Appendix), but could arise from  
270 trans-acting mechanisms (e.g., regulation of genes on non-sex chromosomes by genes located on  
271 the sex chromosome (14)) or by sex-specific differences in epigenetic mechanisms. Genomic  
272 imprinting can allow favorable sex-specific traits to persist across generations by allowing  
273 offspring to only express alleles from one parent, such as the parent that has more reliable  
274 information about the environment offspring will encounter (e.g. the parent that does not  
275 disperse) (21, 40). Further, in bulls, Y-bearing and X-bearing spermatozoa have differentially  
276 expressed proteins, suggesting a mechanism by which fathers can transmit different information  
277 to sons versus daughters (41). Although mothers in many species can also transmit different  
278 information to sons and daughters (e.g., via placental function and gene expression (38, 39)), it is  
279 unclear if mothers can transmit different information to sons and daughters in externally

280 fertilizing species such as sticklebacks, in which mothers do not interact with their offspring  
281 post-fertilization.

282         In contrast to systems with internal fertilization (e.g., mammals), in this experiment we  
283 could completely isolate maternal versus paternal effects mediated via either eggs or sperm  
284 because there was no opportunity for parents to interact pre-fertilization or to influence offspring  
285 post-fertilization. This allowed us to control for mate choice, differential allocation due to  
286 partner quality, and differential allocation mediated via gestation and parental care (including the  
287 selective failure of stressed parents to provide care or successfully rear offspring). All of these  
288 can generate interactions between maternal phenotypes, paternal phenotypes, and offspring sex  
289 (38, 42-44) and obscure the ability to understand whether these sex-specific effects can arise via  
290 epigenetic changes to gametes. Here, we show that these distinct and interactive effects of  
291 maternal and paternal effects can be mediated via selective changes to information encoded in  
292 eggs and sperm. A fascinating direction for future work would be to consider how parenting and  
293 mate choice might influence these results by altering the magnitude and interactive nature of  
294 maternal and paternal effects, the extent to which parental effects selectively influence sons and  
295 daughters, and whether these parental effects have adaptive or maladaptive consequences.

296         In conclusion, we show here that both the sex of the parent and the sex of the offspring  
297 are important for predicting the ways in which offspring phenotypes are altered by parental  
298 experiences. We demonstrate that paternal cues mediated via sperm seem to be just as prominent  
299 as maternal cues mediated via eggs. However, these sex-specific patterns would have been  
300 masked if we had combined cues coming from mothers and fathers (i.e. compared offspring of  
301 two predator-exposed parents to a control) or failed to isolate effects emerging in sons versus  
302 daughters. These sex-specific effects might be favored when it is not adaptive for both sexes to

303 have the induced phenotype or when the same environment favors different phenotypes in males  
304 and females. Collectively, these results suggest that current theoretical and empirical work  
305 seeking to understand the evolution of transgenerational plasticity would benefit from  
306 considering the conditions which favor *sex-specific* patterns of transgenerational plasticity.  
307 Further, given broad interest in understanding the consequences of transgenerational plasticity  
308 for future generations and its potential to influence adaptive evolution, future work should  
309 consider how sex-specific effects in the first generation may alter the ways in which  
310 transgenerational effects persist for multiple generations in lineage-specific or sex-specific ways.

311

## 312 **Methods**

313 ***Housing conditions.*** Adult, freshwater threespined sticklebacks were collected from Putah Creek  
314 (CA, USA). This population has prickly sculpin (*Cottus asper*), which preys primarily on  
315 stickleback eggs, fry, and juveniles. Females were housed in six groups of n=10 fish per tank to  
316 mimic shoaling conditions in the wild. To simulate predation risk, we used a clay model sculpin  
317 (21cm long) to chase females for 90 seconds each day; unexposed treatment tanks were left  
318 undisturbed (similar to (45)). Gravid females were removed from tanks and stripped of their eggs  
319 for in-vitro fertilization. Mothers were chased between 16-44 days; longer exposure increased  
320 offspring length at 4.5 months, but the length of exposure did not significantly alter any other  
321 measured offspring traits (SI Appendix).

322 Males were housed singly to build nests. Once their nest was completed, predator-  
323 exposed males were chased by a model sculpin for 30 sec every other day for 11 days; control  
324 males were left undisturbed. We chased males both less frequently and for less time than females  
325 because males were exposed alone (to mimic breeding season behavior). The day after the last

326 exposure, males were euthanized to obtain sperm for *in-vitro* fertilization. Stickleback males  
327 produce sperm in the beginning of the breeding season (46); thus, paternal cues mediated via  
328 sperm in this experiment are likely due to modifications to mature sperm.

329 F1 offspring were generated using a split clutch design, resulting in: 1) offspring of  
330 unexposed fathers and mothers (n=11 half-clutches), 2) offspring of exposed fathers and  
331 unexposed mothers (n=11 half-clutches), 4) offspring of unexposed fathers and exposed mothers  
332 (n=10 half-clutches), and 4) offspring of exposed fathers and mothers (n=10 half-clutches). By  
333 artificially fertilizing the eggs and incubating the embryos using an air bubbler, we controlled for  
334 possible pre-fertilization effects mediated by interactions between mothers and fathers (42, 44),  
335 as well as the post-fertilization effects mediated by paternal care (47). Separate groups of  
336 offspring were used for each assay described below (see SI Appendix for detailed methods and  
337 statistical analysis).

338  
339 ***Measuring survival under predation risk and ventilation rate.*** At 3-5 months of age,  
340 groups of n=4 offspring (one from each parental treatment) were exposed to a live sculpin  
341 predator. One day prior to the predation assay, fish were weighed, measured, and individually  
342 transferred to a 250ml opaque glass beaker containing 100mL of water. We measured opercular  
343 beats 30 seconds after transferring to the beaker as a proxy for acute stress (29) and 30 minutes  
344 after transferring to understand response to prolonged stress (n=100 fish per parental treatment  
345 group). At the end of thirty minutes, all four fish were moved to the same holding tank until the  
346 predation trial the following day. For the predation trial, sticklebacks were simultaneously  
347 transferred into the sculpin's tank (n=4 different sculpin, each used once per day); the trial ended  
348 two minutes after the first fish was captured by the sculpin. 14/100 trials did not result in any



349 successful captures and were excluded from further analysis. We euthanized the survivors of the  
350 predation assays and used a section of muscle tissue to sex a large portion of the survivors per  
351 the methods of Peichel, *et al.* (48).

352  
353 ***Measuring risk taking behavior.*** When offspring were 4.5 months, we measured  
354 behavior in an open field before and after a simulated predator attack (as in (49)). Individuals  
355 were placed in an opaque refuge in the center of a circular arena divided into nine sections. After  
356 a three minute acclimation period, we removed the plug from the refuge, measured the latency  
357 for fish to emerge, and then measured the number of different (exploration) and total (activity)  
358 sections visited for three minutes after emergence. We then simulated a sculpin predator attack  
359 and measured the latency to resume movement after the simulated attack. Once the individual  
360 resumed movement, we again measured the number of different and total sections visited for  
361 three minutes. We weighed and measured the fish, euthanized it via decapitation, and preserved  
362 the body in ethanol for identification of sex (48). We assayed n=118 fish: n=12 females and  
363 n=18 males with control parents, n=15 females and n=16 males with predator-exposed fathers,  
364 n=13 females and n=14 males with predator-exposed mothers, and n=11 females and n=19 males  
365 with two predator-exposed parents.

366  
367 ***Measuring anxiety/cautiousness.*** Scototaxis (light/dark preference) protocols have been  
368 developed to test anti-anxiety/cautious behavior in fish (30). Fish were placed in a clear cylinder  
369 in the center of a half-black, half-white tank. After a 5-minute acclimation period, we lifted the  
370 cylinder, and fish explored the tank for 15 minutes, during which we measured the latency to  
371 enter the white section, total time in the white section, and the number of times the fish moved

372 between the black/white sections. Principal components analysis (R package factextra) was  
373 used to combine these behaviors into one principal component (eigenvalue 2.10, captured 70.1%  
374 of the variance in behaviors). We interpret greater activity (duration/visits) in the white portion  
375 of the tank as anti-anxiety/cautious behavior (30). We assayed n=162 fish: n=23 females and  
376 n=15 males with control parents, n=22 females and n=17 males with predator-exposed fathers,  
377 n=23 females and n=21 males with predator-exposed mothers, and n=24 females and n=17 males  
378 with two predator-exposed parents.

379

380 ***Measuring brain gene expression.*** We dissected whole brains from 4.5 month juvenile  
381 offspring (n=5 male and n=5 female offspring per treatment group) and preserved brains in  
382 RNAlater. We extracted RNA using Mackerey-Nagel NucleoSpin 96 kits and sent n=39 samples  
383 to the Genomic Sequencing and Analysis Facility at UT Austin for TagSeq library preparation  
384 and sequencing (one sample was of poor quality). To estimate differential expression, pairwise  
385 comparisons between the experimental conditions (offspring of predator-exposed mothers,  
386 offspring of predator-exposed fathers, offspring of predator-exposed mothers and fathers)  
387 relative to the control condition (offspring of unexposed parents) within each sex were made  
388 using edgeR (50). To call differential expression, we used a ‘glm’ approach and adjusted actual  
389 p-values via empirical FDR, where a null distribution of p-values was determined by permuting  
390 sample labels for 500 times for each tested contrast and a false discovery rate was estimated (51).

391 In a separate analysis, WGCNA was used to cluster genes into co-expressed gene  
392 modules (52, 53). To find modules significantly associated with treatment effects, we fitted a  
393 linear model (54) which blocked for clutch ID as random factor, along with main and interactive  
394 effects of sex, paternal treatment, and maternal treatment on module eigengenes. Eigengenes

395 which were significantly associated ( $p < 0.05$ ) with either the main or interactive effects of sex,  
396 paternal treatment, and maternal treatment were retained.

397

398 ***Animal welfare note.*** All methods were approved by Institutional Animal Care and Use  
399 Committee of University of Illinois Urbana-Champaign (protocol ID 15077), including the use  
400 of live predators.

401 **Acknowledgements**

402           Thank you to Eunice Chen, Erin Hsiao, Yangxue Ma, Liam Masse, and Christian  
403 Zielinski for help with data collection and to Sarah Donelan and the Bell lab for comments on  
404 previous versions of this manuscript. This work was supported by the National Institutes of  
405 Health award number 2R01GM082937-06A1 to Alison Bell and National Institutes of Health  
406 NRSA fellowship F32GM121033 to Jennifer Hellmann.

## 407 References

- 408 1. M. Andersson, *Sexual selection* (Princeton University Press, New York, 1994).
- 409 2. R. Lande, Sexual dimorphism, sexual selection, and adaptation in polygenic characters.  
410 *Evolution* **34**, 292-305 (1980).
- 411 3. J. P. Reeve, D. J. Fairbairn, Predicting the evolution of sexual size dimorphism. *Journal*  
412 *of Evolutionary Biology* **14**, 244-254 (2001).
- 413 4. R. C. Stillwell, W. U. Blanckenhorn, T. Teder, G. Davidowitz, C. W. Fox, Sex  
414 differences in phenotypic plasticity affect variation in sexual size dimorphism in insects:  
415 from physiology to evolution. *Annual review of entomology* **55**, 227-245 (2010).
- 416 5. D. Meuthen, S. A. Baldauf, T. C. M. Bakker, T. Thünken, Neglected patterns of variation  
417 in phenotypic plasticity: age- and sex-specific antipredator plasticity in a cichlid fish. *The*  
418 *American Naturalist* **191**, 475-490 (2018).
- 419 6. W. Xu *et al.*, Sex differences in alarm response and predation risk in the fresh water snail  
420 *Pomacea canaliculata*. *Journal of Molluscan Studies* **80**, 117-122 (2014).
- 421 7. C. P. Ceballos, N. Valenzuela, The role of sex-specific plasticity in shaping sexual  
422 dimorphism in a long-lived vertebrate, the snapping turtle *Chelydra serpentina*.  
423 *Evolutionary Biology* **38**, 163 (2011).
- 424 8. R. Bonduriansky, M. Head, Maternal and paternal condition effects on offspring  
425 phenotype in *Telostylinus angusticollis* (Diptera: Neriidae). *Journal of Evolutionary*  
426 *Biology* **20**, 2379-2388 (2007).
- 427 9. T. Gilad, I. Scharf, Separation between maternal and paternal effects on offspring  
428 following exposure of adult red flour beetles to two stressors. *Ecological Entomology* **0**  
429 (2019).
- 430 10. R. Bonduriansky, A. Runagall-McNaull, A. J. Crean, The nutritional geometry of  
431 parental effects: maternal and paternal macronutrient consumption and offspring  
432 phenotype in a neriid fly. *Functional Ecology* **30**, 1675-1686 (2016).
- 433 11. B. R. Mueller, T. L. Bale, Early prenatal stress impact on coping strategies and learning  
434 performance is sex dependent. *Physiology & Behavior* **91**, 55-65 (2007).
- 435 12. E. C. Braithwaite, S. E. Murphy, P. G. Ramchandani, J. Hill, Associations between  
436 biological markers of prenatal stress and infant negative emotionality are specific to sex.  
437 *Psychoneuroendocrinology* **86**, 1-7 (2017).
- 438 13. A. K. Short *et al.*, Elevated paternal glucocorticoid exposure alters the small noncoding  
439 RNA profile in sperm and modifies anxiety and depressive phenotypes in the offspring.  
440 *Translational Psychiatry* **6**, e837 (2016).
- 441 14. D. C. Metzger, P. M. Schulte, Maternal stress has divergent effects on gene expression  
442 patterns in the brains of male and female threespine stickleback. *Proceedings of the Royal*  
443 *Society B: Biological Sciences* **283** (2016).
- 444 15. K. M. Schulz *et al.*, Maternal stress during pregnancy causes sex-specific alterations in  
445 offspring memory performance, social interactions, indices of anxiety, and body mass.  
446 *Physiology & behavior* **104**, 340-347 (2011).
- 447 16. Alexander V. Badyaev, Maternal inheritance and rapid evolution of sexual size  
448 dimorphism: passive effects or active strategies? *The American Naturalist* **166**, S17-S30  
449 (2005).
- 450 17. C. Emborski, A. Mikheyev, S., Ancestral diet transgenerationally influences offspring in  
451 a parent-of-origin and sex-specific manner. *Philosophical Transactions of the Royal*  
452 *Society B: Biological Sciences* **374**, 20180181 (2019).

- 453 18. K. E. Zirbel, B. W. Alto, Maternal and paternal nutrition in a mosquito influences  
454 offspring life histories but not infection with an arbovirus. *Ecosphere* **9**, e02469 (2018).
- 455 19. A. J. Crean, R. Bonduriansky, What is a paternal effect? *Trends in Ecology & Evolution*  
456 **29**, 554-559 (2014).
- 457 20. F. Garcia-Gonzalez, K. Dowling Damian, Transgenerational effects of sexual interactions  
458 and sexual conflict: non-sires boost the fecundity of females in the following generation.  
459 *Biology Letters* **11**, 20150067 (2015).
- 460 21. R. Bonduriansky, T. Day, Nongenetic inheritance and its evolutionary implications.  
461 *Annual Review of Ecology, Evolution, and Systematics* **40**, 103-125 (2008).
- 462 22. T. E. Reimchen, Spine deficiency and polymorphism in a population of *Gasterosteus*  
463 *aculeatus*: an adaptation to predators? *Canadian Journal of Zoology* **58**, 1232-1244  
464 (1980).
- 465 23. T. E. Reimchen, P. Nosil, Ecological causes of sex-biased parasitism in threespine  
466 stickleback. *Biological Journal of the Linnean Society* **73**, 51-63 (2001).
- 467 24. T. E. Reimchen, D. Steeves, C. A. Bergstrom, Sex matters for defence and trophic traits  
468 of threespine stickleback. *Evolutionary Ecology Research* **17**, 459-485 (2016).
- 469 25. S. Johnson, U. Candolin, Predation cost of a sexual signal in the threespine stickleback.  
470 *Behavioral Ecology* **28**, 1160-1165 (2017).
- 471 26. U. Candolin, Reproduction under predation risk and the trade-off between current and  
472 future reproduction in the threespine stickleback. *Proceedings of the Royal Society of*  
473 *London. Series B: Biological Sciences* **265**, 1171 (1998).
- 474 27. M. A. Bell, S. A. Foster, *The evolutionary biology of the threespine stickleback* (Oxford  
475 University Press, Oxford, 1994).
- 476 28. T. E. Reimchen, P. Nosil, Variable predation regimes predict the evolution of sexual  
477 dimorphism in a population of threespine stickleback. *Evolution* **58**, 1274-1281 (2004).
- 478 29. A. M. Bell, L. Henderson, F. A. Huntingford, Behavioral and respiratory responses to  
479 stressors in multiple populations of three-spined sticklebacks that differ in predation  
480 pressure. *Journal of Comparative Physiology B* **180**, 211-220 (2010).
- 481 30. C. Maximino, T. Marques de Brito, C. A. G. d. M. Dias, A. Gouveia Jr, S. Morato,  
482 Scototaxis as anxiety-like behavior in fish. *Nature Protocols* **5**, 209 (2010).
- 483 31. M. Del Giudice, Fetal programming by maternal stress: Insights from a conflict  
484 perspective. *Psychoneuroendocrinology* **37**, 1614-1629 (2012).
- 485 32. M. J. Sheriff *et al.*, Integrating ecological and evolutionary context in the study of  
486 maternal stress. *Integrative and Comparative Biology* **57**, 437-449 (2017).
- 487 33. A. Stratmann, B. Taborsky, W. Blanckenhorn, Antipredator defences of young are  
488 independently determined by genetic inheritance, maternal effects and own early  
489 experience in mouthbrooding cichlids. *Functional Ecology* **28**, 944-953 (2014).
- 490 34. A. M. Bell, J. K. Hellmann, An integrative framework for understanding the mechanisms  
491 and multigenerational consequences of transgenerational plasticity. *Annual Review of*  
492 *Ecology, Evolution and Systematics* (in press).
- 493 35. A. Kong, V. Steinthorsdottir, G. Masson, et, al, Parental origin of sequence variants  
494 associated with complex diseases. *Nature* **462**, 868 (2009).
- 495 36. Y. L. Saldivar, J.-P. Vielle-Calzada, M. G. Ritchie, C. M. Garcia, Asymmetric paternal  
496 effect on offspring size linked to parent-of-origin expression of an insulin-like growth  
497 factor. *Ecology and Evolution* **7**, 4465-4474 (2017).

- 498 37. H. A. Lawson, J. M. Cheverud, J. B. Wolf, Genomic imprinting and parent-of-origin  
499 effects on complex traits. *Nature Reviews Genetics* **14**, 609 (2013).
- 500 38. T. L. Bale, Sex differences in prenatal epigenetic programming of stress pathways. *Stress*  
501 **14**, 348-356 (2011).
- 502 39. V. Glover, J. Hill, Sex differences in the programming effects of prenatal stress on  
503 psychopathology and stress responses: An evolutionary perspective. *Physiology &*  
504 *Behavior* **106**, 736-740 (2012).
- 505 40. G. A. Dunn, T. L. Bale, Maternal high-fat diet effects on third-generation female body  
506 size via the paternal lineage. *Endocrinology* **152**, 2228-2236 (2011).
- 507 41. C. Scott *et al.*, Proteomic profile of sex-sorted bull sperm evaluated by SWATH-MS  
508 analysis. *Animal Reproduction Science* **198**, 121-128 (2018).
- 509 42. R. Mashoodh, B. Franks, J. P. Curley, F. A. Champagne, Paternal social enrichment  
510 effects on maternal behavior and offspring growth. *Proceedings of the National Academy*  
511 *of Sciences* **109**, 17232-17238 (2012).
- 512 43. R. Mashoodh, I. B. Habrylo, K. M. Gudsruk, G. Pelle, F. A. Champagne, Maternal  
513 modulation of paternal effects on offspring development. *Proceedings of the Royal*  
514 *Society B: Biological Sciences* **285**, 20180118 (2018).
- 515 44. K. E. McGhee, S. Feng, S. Leasure, A. M. Bell, A female's past experience with  
516 predators affects male courtship and the care her offspring will receive from their father.  
517 *Proceedings of the Royal Society B: Biological Sciences* **282** (2015).
- 518 45. M. Dellinger, W. Zhang, A. M. Bell, J. K. Hellmann, Do male sticklebacks use visual  
519 and/or olfactory cues to assess a potential mate's history with predation risk? *Animal*  
520 *Behaviour* **145**, 151-159 (2018).
- 521 46. B. Borg, Seasonal effects of photoperiod and temperature on spermatogenesis and male  
522 secondary sexual characters in the three-spined stickleback, *Gasterosteus aculeatus* L.  
523 *Canadian Journal of Zoology* **60**, 3377-3386 (1982).
- 524 47. L. R. Stein, A. M. Bell, Paternal programming in sticklebacks. *Animal Behaviour* **95**,  
525 165-171 (2014).
- 526 48. C. L. Peichel *et al.*, The master sex-determination locus in threespine sticklebacks is on a  
527 nascent Y chromosome. *Current Biology* **14**, 1416-1424 (2004).
- 528 49. M. K. Bensky, R. Paitz, L. Pereira, A. M. Bell, Testing the predictions of coping styles  
529 theory in threespined sticklebacks. *Behavioural Processes* **136**, 1-10 (2017).
- 530 50. M. D. Robinson, D. J. McCarthy, G. K. Smyth, edgeR: a Bioconductor package for  
531 differential expression analysis of digital gene expression data. *Bioinformatics* **26**, 139-  
532 140 (2010).
- 533 51. J. D. Storey, R. Tibshirani, Statistical significance for genomewide studies. *Proceedings*  
534 *of the National Academy of Sciences* **100**, 9440 (2003).
- 535 52. P. Langfelder, S. Horvath, WGCNA: an R package for weighted correlation network  
536 analysis. *BMC Bioinformatics* **9**, 559 (2008).
- 537 53. B. Zhang, S. Horvath (2005) A general framework for weighted gene co-expression  
538 network analysis. in *Statistical Applications in Genetics and Molecular Biology*.
- 539 54. A. Kuznetsova, P. Brockhoff, R. Christensen, lmerTest package: tests in linear mixed  
540 effects models. *Journal of Statistical Software* **82**, 1-26 (2017).
- 541

542 **Figure Legends**

543 **Figure 1:** The effects of maternal and paternal treatment on offspring in an open field assay,  
544 scototaxis assay, and survival in the face of a live predator. A) Male offspring (right) of predator-  
545 exposed fathers were significantly more exploratory and active (PCA: higher values indicate  
546 more active and exploratory individuals; mean  $\pm$  s.e.) compared to male offspring of control  
547 fathers; paternal treatment did not affect the exploratory behavior/activity of female offspring  
548 (left). The effect of paternal treatment did not depend on maternal treatment (control: grey;  
549 predator-exposed: yellow). N= 118 offspring. Stars indicate significant differences across  
550 treatment groups. B) Offspring of predator-exposed mothers were more cautious (PCA: high  
551 values indicate longer latency to enter the white area and spent less time in the white area; mean  
552  $\pm$  s.e.) compared to offspring of control mothers. Further, female offspring (left) were more  
553 cautious than male offspring (right). The effect of maternal treatment did not depend on paternal  
554 treatment (control: grey; predator-exposed: blue). N= 162 offspring. C) In live predation trials,  
555 juvenile offspring of predator-exposed fathers, but not two predator-exposed parents, were  
556 significantly more likely to be captured and consumed by the sculpin predator relative to  
557 offspring of control fathers. Letters indicate significant differences among treatment groups,  
558 determined by Tukey's HSD with parental treatment as a 4-level variable. N= 86 trials. Within  
559 each figure, data are plotted to facilitate visualization of the statistically significant interaction  
560 terms.

561  
562 **Figure 2:** Differential gene and eigen-gene expression analysis. A-B) The three circles in the  
563 Venn diagram show the number of genes that were differentially expressed in the brain of  
564 offspring of unexposed parents relative to offspring of predator-exposed mothers ("maternal"),



565 predator-exposed fathers (“paternal”), or two predator-exposed parents (“both”), with daughters  
566 in (A) and sons in (B). Note that relatively few genes overlap between the different pairwise  
567 comparisons. The heatmaps show the direction of gene regulation (blue: downregulated; red:  
568 upregulated) of the differentially expressed genes that are shared among the three pairwise  
569 comparisons, with daughters and sons shown separately. C) The expression profiles of the four  
570 eigen-gene modules which were significantly affected by the three-way interaction among  
571 paternal treatment, maternal treatment and offspring sex (mean  $\pm$  s.e.). N=39 offspring.

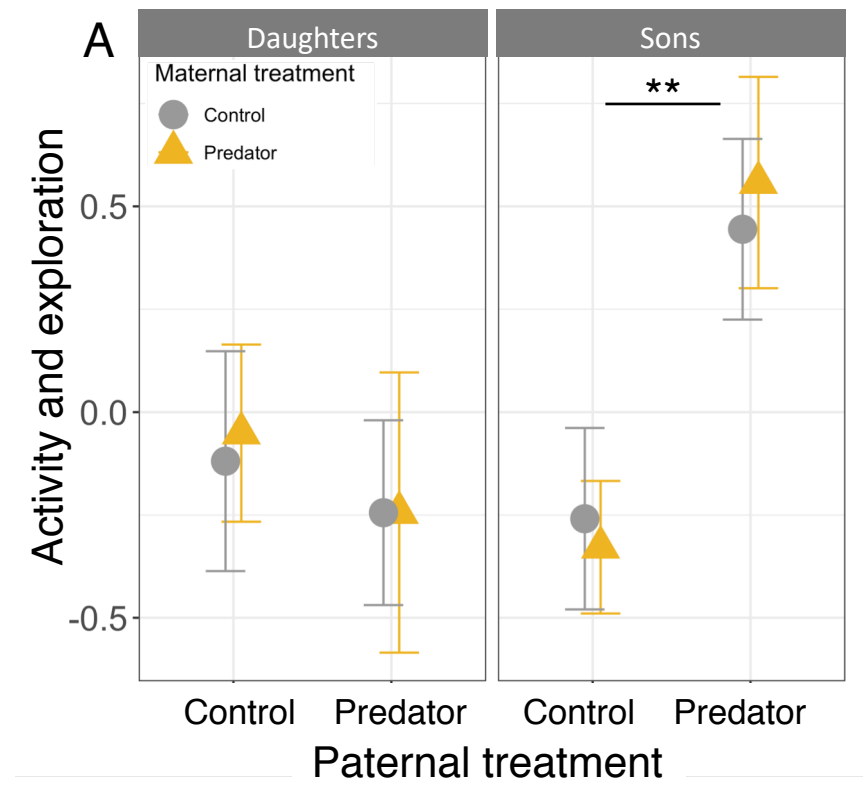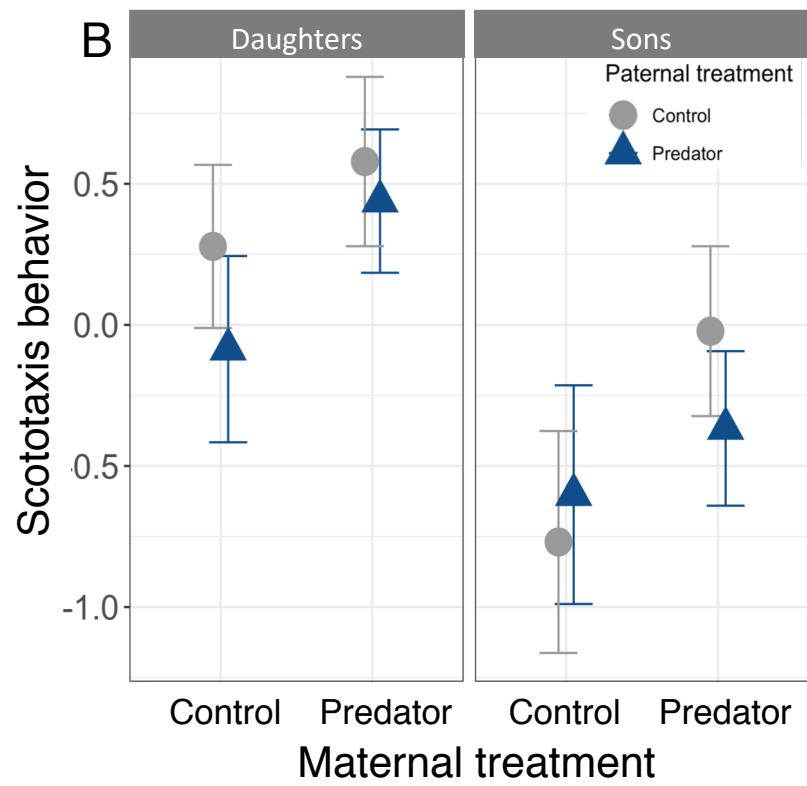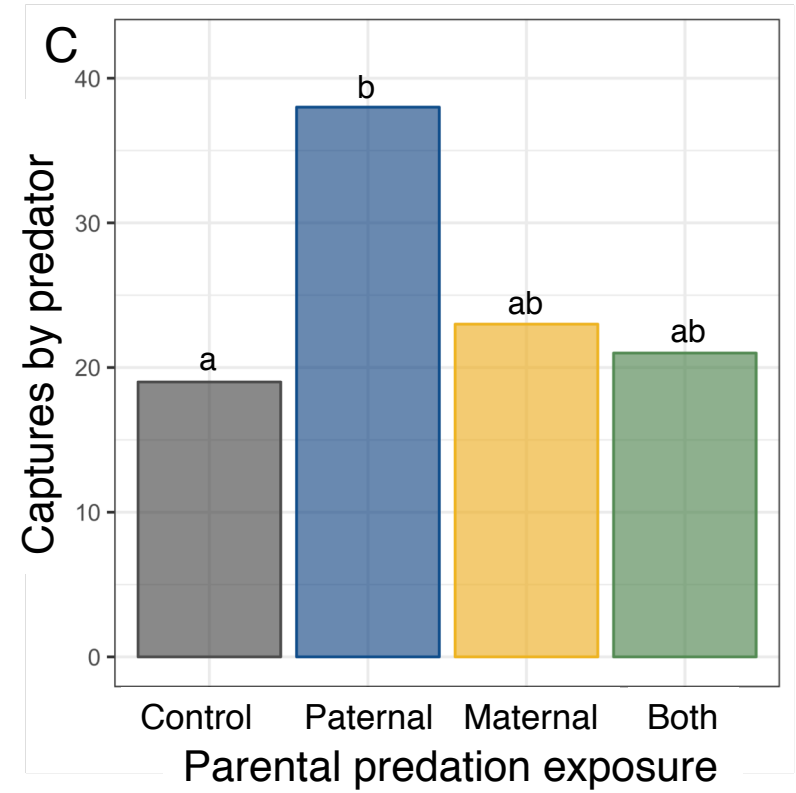

**A****Daughters**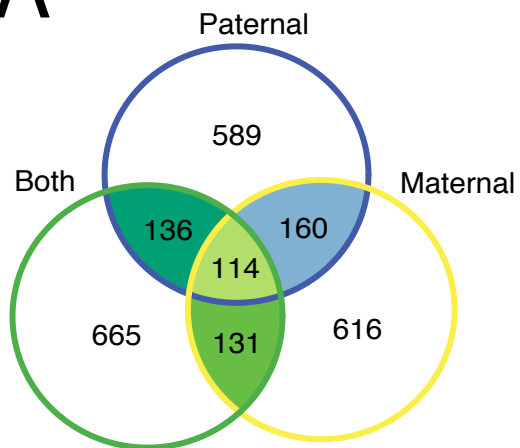**B****Sons**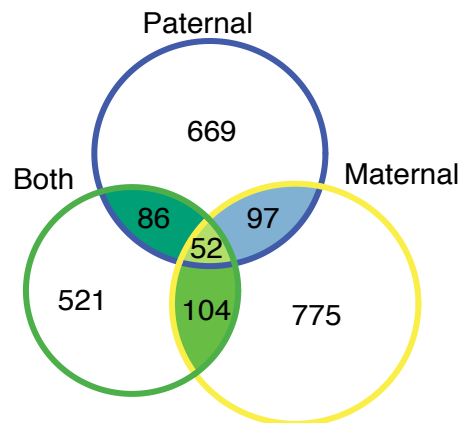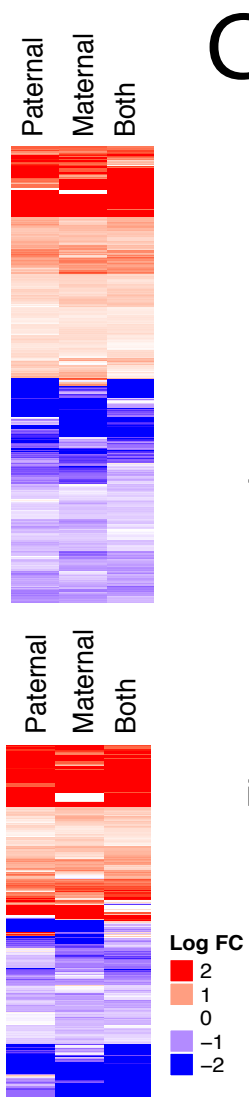**C**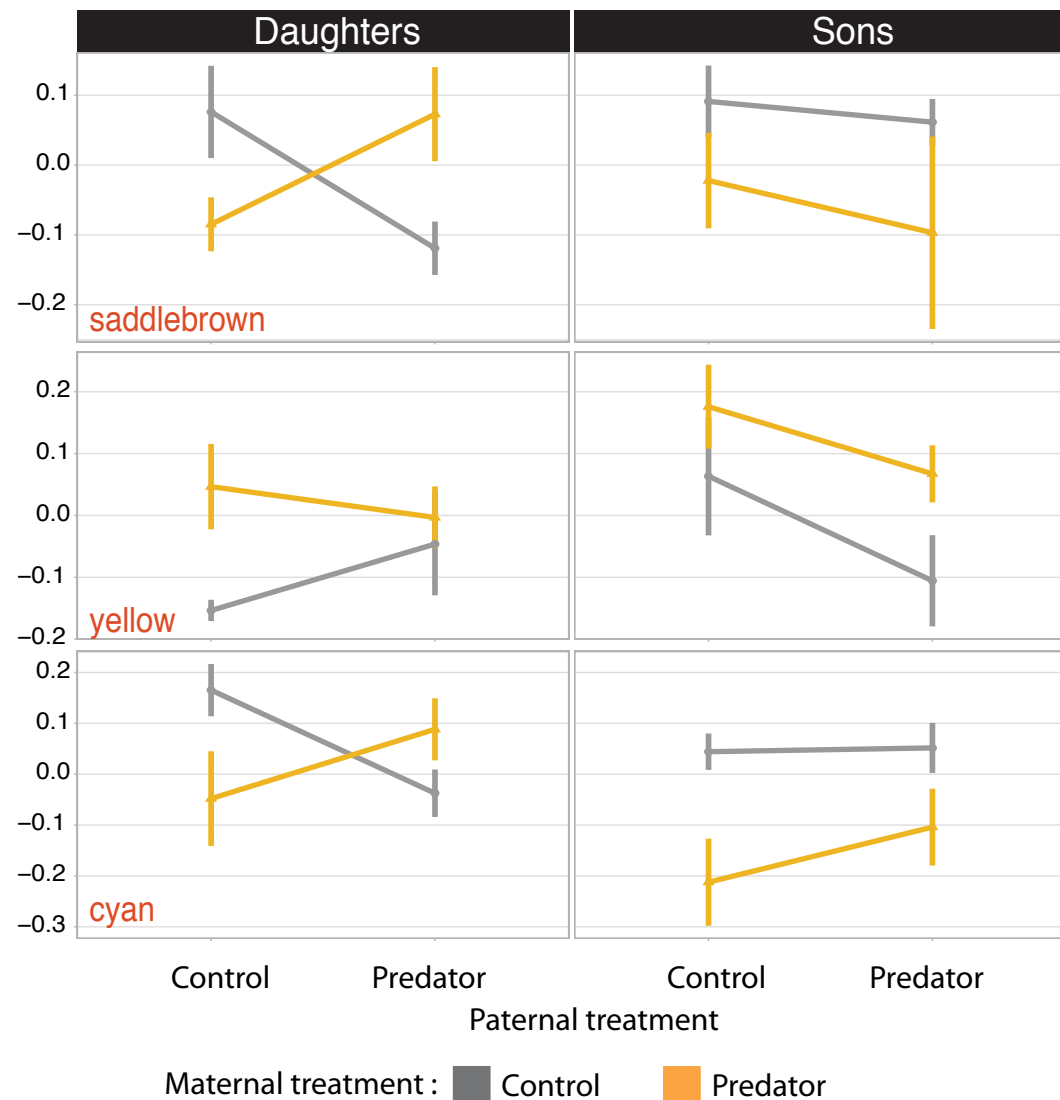

Source: https://www.biorxiv.org/content/10.1101/763862v1.full.pdf
