# **Sex-specific transgenerational plasticity in threespined sticklebacks**

Jennifer K Hellmann <sup>1\*</sup>, Syed Abbas Bukhari <sup>1</sup>, Jack Deno <sup>1</sup>, Alison M Bell <sup>1,2,3</sup>

<sup>1</sup>Department of Evolution, Ecology and Behavior, School of Integrative Biology, University of Illinois Urbana-Champaign, Urbana, Illinois, USA, 61801

<sup>2</sup>Carl R. Woese Institute for Genomic Biology, University of Illinois Urbana-Champaign, Urbana, Illinois, USA, 61801

<sup>3</sup>Program in Ecology, Evolution and Conservation, University of Illinois Urbana-Champaign, Urbana, Illinois, USA, 61801

\*Corresponding author: Jennifer Hellmann, 505 S Goodwin Ave, Urbana IL 61801, 215-527-3572, [hellmann@illinois.edu](mailto:hellmann@illinois.edu)

# Introductory paragraph

Sex-specific selection pressures can generate different phenotypic optima for males and females in response to the current environment. Less widely appreciated is the possibility of sex-specific transgenerational plasticity (TGP): mothers and fathers may exert different effects on offspring traits and parental cues may persist selectively across generations via only daughters or sons. Here, we demonstrate that maternal and paternal exposure to predation risk has largely distinct effects on offspring behavior in threespined sticklebacks (*Gasterosteus aculeatus*), with non-additive interactions between maternal and paternal effects on offspring survival and brain gene expression profiles. Further, parental effects on offspring behavior and brain gene expression profiles varied between male and female offspring, suggesting that mothers and fathers activate different developmental programs in sons versus daughters. Altogether these results demonstrate that sex- both of the parent and offspring- influences TGP patterns in ways that may reflect the distinct life history trajectories of males and females.

**Key words:** maternal effect, paternal effect, *Gasterosteus aculeatus*, phenotypic plasticity, intergenerational plasticity, nongenetic inheritance

Sex differences in life-history (e.g. mortality rate) or reproductive strategies can favor different optimal phenotypes in males and females<sup>1</sup>. Sex-specific patterns of within-generational plasticity have been documented in diverse taxa<sup>2, 3, 4, 5</sup>. While less explored, there also is evidence for sex-specific *transgenerational* plasticity (TGP; also referred to as intergenerational plasticity or environmental parental effects); specifically, that the sex of the parent and/or the offspring can alter the ways in which environments encountered by recent ancestors affect future generations. For example, maternal versus paternal exposure to the same environmental condition can have different effects on offspring<sup>6, 7, 8</sup> and the influence of parental cues (whether mediated by the mother or the father) often depends on the sex of the offspring<sup>9, 10, 11, 12, 13, 14, 15</sup>.

Recent theoretical models exploring the evolution of TGP assume that mothers transmit information about the current environment and offspring integrate maternal cues with environmental cues provided by genes and early-life experiences<sup>16, 17, 18, 19</sup>. However, these models largely do not consider that offspring simultaneously integrate information from mothers and fathers, such that the influence of maternal cues might depend on paternal cues (or vice versa)<sup>7, 20, 21, 22</sup>. Similarly, offspring might selectively respond to information from one parent over the other, a pattern that is largely underexplored, but likely if one parent is a more reliable source of environmental information (e.g. the same-sex parent, the non-dispersing parent). Interactions between maternal cues, paternal cues, and offspring sex are probably common given the prevalence of sex-specific developmental plasticity, and may be central to understanding the evolution of TGP.

Here, we evaluate the potential for interactions between maternal cues, paternal cues, and offspring sex in threespined sticklebacks (*Gasterosteus aculeatus*). Understanding the ways in which the maternal cues, paternal cues, and offspring sex interact during TGP could help clarify

evolutionary phenomena such as sexual conflict, parent-offspring conflict, and genomic imprinting, which is thought to arise from sexual conflict over resource allocation to offspring. For example, sexual conflict may cause mothers and fathers to favor different phenotypes in their offspring, resulting in the evolution of mechanisms that allow mothers to manipulate the ways in which fathers influence offspring (e.g. via cytoplasmic contributions<sup>23</sup>) or fathers to manipulate the ways in which mothers influence offspring (e.g. via ejaculate composition<sup>24</sup>). Further, nongenetic inheritance that functions in a sex-specific manner can resolve evolutionary conflicts that occur when selection favors different phenotypes in sons and daughters<sup>25</sup> because male versus female offspring may integrate parental information in ways that match their distinct life history trajectories. One way that such sex-specific inheritance could operate is if cues from mothers and fathers activate different developmental programs in daughters and sons.

Male and female sticklebacks are sexually dimorphic in several respects, such as habitat use<sup>26</sup> and diet<sup>27</sup>, and have a variety of male-specific reproductive traits that increase male vulnerability to predation risk<sup>28,29</sup>: male sticklebacks develop bright nuptial coloration, engage in conspicuous territory defense and courtship behavior, and are the sole providers of paternal care that is necessary for offspring survival<sup>30</sup>. These sex differences in behavior and life history likely alter the predation regimes experienced by mothers versus fathers<sup>31</sup> and the optimal phenotype for daughters versus sons in response to predation risk. We exposed adult male and female sticklebacks to simulated predation risk prior to fertilization and used a fully factorial design to generate offspring of control (unexposed) parents, offspring of predator-exposed mothers, offspring of predator-exposed fathers, and offspring of predator-exposed mothers and fathers. Because predation risk varies in both space and time, it is likely that there is a mix of reproductively mature males and females who either have or have not recently experienced

predation risk within many natural populations. We reared sons and daughters under ‘control’ conditions (i.e. in the absence of predation risk). We evaluated traits relevant to predator defense and used brain gene expression data to gain insights into the underlying mechanisms.

## Results

### *Sons, but not daughters, of predator-exposed fathers were more active under risk*

We compared maternal and paternal exposure to predation risk on the risk-taking behavior of sons and daughters (n=118 offspring). We used an open field assay to measure offspring activity/exploration and boldness under baseline conditions and after a simulated predator attack. Offspring were significantly less active/exploratory after the simulated predator attack compared to before (principal component analysis: higher values indicate more active and explorative individuals; Table 1), confirming that offspring behaviorally responded to the predator attack. There was a significant interaction between paternal treatment and offspring sex on offspring activity/exploration (Table 1; Figure 1A). Specifically, sons of predator-exposed fathers were significantly more active/exploratory compared to sons of control fathers (95% CI in brackets here and below [-1.30, -0.20],  $p=0.01$ ), but there was not a detectable effect of paternal treatment on female offspring ([-0.40, 0.81],  $p=0.49$ ). This suggests that sons were especially responsive to paternal exposure to predation risk. Greater activity in response to exposure to predation risk is consistent with higher risk-taking behavior observed in sticklebacks from high predation populations compared to low predation populations<sup>32</sup>.

We did not detect a significant effect of maternal or paternal treatment on boldness (principal component analysis: higher values indicate less bold fish with an increased latency to emerge from the shelter and to resume movement after the predator attack), although female

offspring were less bold than male offspring (Table 1). We found no evidence that standard length or body mass at 4.5 months were significantly influenced by maternal (SL [1.14, 1.99],  $p=0.67$ ; mass [-0.03, 0.02],  $p=0.91$ ) or paternal (SL [-1.77, 1.38],  $p=0.78$ ; mass [-0.03, 0.03],  $p=0.96$ ) exposure to predation risk. Standard length ([-1.24, 0.35],  $p=0.25$ ) and mass ([-0.003, 0.01],  $p=0.20$ ) also did not vary between male and female offspring, although larger fish were less active/exploratory and less bold (Table 1).

### ***Offspring of predator-exposed mothers, but not fathers, were more cautious***

Scototaxis – preference for dark – is often associated with increased cautiousness, or anxiety-like behavior<sup>33</sup>. In order to determine whether a parent's experience with predation risk influences the anxiety-like behavior of their offspring<sup>34</sup>, we conducted light-dark preference tests in a half-black/half-white tank ( $n=162$  offspring). Offspring of predator-exposed mothers were more cautious (principal component analysis: took longer to enter the white area, spent less time in the white area, and switched less between black and white areas) compared to offspring of control mothers (MCMC GLMM: 95% CI [0.06, 1.09],  $p=0.03$ ; Figure 1B). However, we did not detect an effect of paternal treatment on offspring scototaxis behavior ([-0.79, 0.32],  $p=0.44$ ). Both female ([-1.27, -0.17],  $p=0.01$ ) and smaller ([-0.10, -0.006],  $p=0.03$ ) offspring showed more cautious behavior. We found no evidence of seasonal effects (experimental day [-0.004, 0.01],  $p=0.33$ ).

### ***Mothers mitigated the fitness costs of paternal exposure to predation risk***

To understand if parents' experience with predation risk altered offspring survival in an encounter with a predator (reviewed in Sheriff, MacLeod<sup>35</sup>), we measured offspring survival

against live sculpin predators (n=100 trials) as well as response to an acute stressor (confinement stress, 30 seconds and 30 minutes after initial confinement, n=400 individuals per timepoint). There was a significant interaction between maternal and paternal treatment on offspring survival in live predation assays (generalized linear mixed effect model:  $Z_{335} = -1.98, 0.047$ ). Specifically, offspring of predator-exposed fathers were more frequently captured by the predator compared to offspring of control parents, but this was not true for offspring of predator-exposed mothers or both a predator-exposed mother and father (Figure 1C). This suggests that was a strong fitness cost of having a predator-exposed father, but mothers seemed to mitigate those costs, perhaps by making their offspring more cautious (see above). Survivors of the successful predation trials were heavily female biased (93/148; Chi-squared:  $\chi^2=9.76, p=0.002$ ), suggesting that males are generally more vulnerable to predation risk. The sex-bias was not significantly different across treatment groups ( $\chi^2=3.03, p=0.39$ ). We found no effect of size on how frequently the stickleback were captured by the predator ( $Z_{335} = 1.56, 0.11$ ).

We found no significant difference between stress-induced respiration rates after initial confinement or after 30 minutes of confinement (95% CI [-2.77, 3.16],  $p=0.90$ ). We did not detect a significant effect of maternal ([-4.79, 12.44],  $p=0.36$ ) or paternal treatment ([-16.91, 4.05],  $p=0.20$ ) on stress-induced respiration, although larger fish tended to have lower stress-induced respiration compared to smaller fish ([-2.24, 0.14],  $p=0.08$ ). For the portion of offspring where sex was known, we found non-significant interactions between offspring sex and paternal ([-17.67, 14.83],  $p=0.89$ ) or maternal treatment ([-23.89, 8.77],  $p=0.37$ ), although males tended to have higher opercular beats than females (main effect of sex [-1.48, 25.92],  $p=0.08$ ). Individuals with lower opercular beat rate at initial confinement ( $Z_{336} = -1.92, p=0.05$ ) and after

30 minutes of confinement ( $Z_{336} = -1.75$ ,  $p=0.08$ ) tended to be more likely to be captured by the predator.

# ***Distinct and nonadditive effects of maternal and paternal treatment on offspring brain gene expression***

The results described above suggest that predation risk experienced by mothers versus fathers has very different consequences for offspring development. In order to evaluate this question at the molecular level, we used pair-wise contrasts to compare the baseline brain gene expression profile of offspring of unexposed parents (control) to offspring with a predator-exposed mother, a predator-exposed father, and two predator-exposed parents in male and female offspring ( $n=39$  individuals). In terms of the number of genes, the effects of maternal and paternal treatment on brain gene expression were approximately equivalent in magnitude, and the genes were largely nonoverlapping (Figure 2A,B): in sons, for example, 1028 genes were differentially expressed in response to maternal experience with risk, 904 genes were differentially expressed in response to paternal experience with risk while only 253 genes were shared between them (daughters show a similar pattern, Figure 2A). Interestingly, there was also a large number of genes that were unique to the “both” condition, i.e. between offspring of two predator-exposed parents versus the control; these differentially expressed genes could reflect the ways in which maternal and paternal effects interact at the molecular level.

Of the differentially expressed genes that were shared between the pairwise comparisons, nearly all were concordantly regulated, for both sons and daughters (Figure 2A,B). This suggests that, despite the large-scale differences in brain gene expression between offspring of predator-



exposed mothers and fathers, there is a core set of genes that is activated in offspring brains in response to either maternal or paternal exposure to predation risk.

# ***Maternal and paternal exposure to predation risk interacted with offspring sex to influence offspring brain gene expression***

The behavioral data suggest that sons and daughters respond to parental experience with predation risk differently, with sons, but not daughters, increasing activity/exploration in response to paternal experience with predation risk. One way that such sex-specific inheritance could arise is if cues from one parent (e.g. fathers) activate a particular developmental program in one offspring sex but not the other (e.g. in sons but not daughters).

To test this hypothesis, we used WGCNA to identify clusters (“modules”) of genes with coordinated expression patterns. This procedure reduced the dimensionality of the transcriptomic dataset, which allowed us to explore the potential for interactive effects of maternal treatment, paternal treatment and offspring sex on modules of genes with correlated expression patterns. WGCNA identified 23 informative modules in the dataset. The expression of eight of the 23 modules was significantly affected by at least one of the factors in the model: three modules were significantly affected by maternal treatment, two were significantly affected by the two-way interaction between maternal and paternal treatment, and three were significantly affected by the three-way interaction between paternal treatment, maternal treatment and offspring sex (shown in Figure 2C). For example, the module “saddle brown” comprises 48 co-expressed genes (largely enriched for developmental processes) whose expression was influenced by the three way interaction between maternal treatment, paternal treatment and offspring sex. Specifically, daughters of a predator-exposed mother or father showed lower expression of genes

in this module compared to daughters of control parents or two predator-exposed parents (Figure 2C). For sons, on the other hand, the expression of genes in this module was more strongly affected by maternal treatment. A similar pattern was observed in the yellow and cyan modules. Overall these results demonstrate that at the molecular level, daughters and sons differ in the extent to which they respond to predation risk that had been experienced by their mother, father or by both parents.

## Discussion

Transgenerational plasticity can allow environmental information to be delivered to offspring earlier and with potentially lower costs to offspring than developmental plasticity, which may allow offspring to develop traits during early development that help them cope with environmental change<sup>36, 37</sup>. Unlike genetic inheritance, TGP can potentially be fine-tuned to the precise environment that both parents and offspring will encounter<sup>25</sup>, including the different environments experienced by males and females because of sex differences in life history and reproductive strategies. The results reported here draw attention to the importance of sex-specific TGP: offspring phenotypes varied depending on whether predation risk had been experienced by their mother or their father, and a parent's experience with predation risk produced different phenotypes in their sons compared to their daughters.

We found that maternal and paternal exposure to the same environmental factor (predation risk) generated largely distinct effects in offspring: predator-exposed mothers produced more cautious offspring (scototaxis), while predator-exposed fathers produced sons, but not daughters, that were more active under risk (more active and exploratory in open field assays). There were also non-additive interactions between maternal and paternal effects on

some (survival, gene expression), but not all (scototaxis, open field behavior) offspring traits. In particular, offspring of predator-exposed fathers had reduced survival against a live predator; however, offspring of two predator-exposed parents did not have reduced survival, suggesting that maternal predation exposure may mitigate the deleterious effects of paternal predation exposure to some degree. Despite the fact that maternal effects seemingly over-rode paternal effects on survival, we did not find evidence that maternal effects were necessarily more dominant at the molecular level, as comparable numbers of genes were differentially expressed in response to maternal versus paternal treatment. Moreover, the brain gene expression profile of offspring of two predator-exposed parents did not more closely resemble the gene expression profile of offspring of predator-exposed mothers. Instead, our results are more consistent with the hypothesis that non-additive interactions between the environments experienced by mothers and fathers produce a distinct neurogenomic profile.

In addition to interactions between maternal and paternal effects, we found strong evidence that sons and daughters differ in their phenotypic response to maternal and paternal exposure to predation risk. These sex-specific patterns emerged in our study well before offspring were reproductively mature, during a period in their life when males and females are shoaling and still occupying similar habitats<sup>30</sup>. Interestingly, these sex-specific patterns of transgenerational plasticity did not seem to emerge along a consistent male-female divide (e.g. sons attend to their father and daughters attend to their mother); instead, sons and daughters were altered by paternal and maternal environments at a relatively similar magnitude, but in different ways. These sex-specific effects may result from differences in sons and daughters in their susceptibility to parental stress<sup>38, 39</sup> and/or may be adaptive for offspring, with differences originating in early development to allow offspring to develop phenotypes that are better

matched to the different environments they will encounter later in life. For example, it is possible that increased activity under risk for sons, but not daughters, may be adaptive because high variance in male reproductive success favors males that adopt high risk, high reward behaviors to increase growth and access to resources under high predation pressure<sup>32</sup>. Our study shows that maternal and paternal predation exposure can have fitness consequences for offspring (i.e., via survival) in the lab; work is needed in a more natural context in the field to assess whether these parental effects have adaptive or maladaptive consequences.

Whether the fitness interests of mothers, fathers, and offspring align or conflict has important implications for understanding how and why sex-specific TGP evolves. On the one hand, sex-specific TGP may arise because mothers and fathers favor different optimal offspring phenotypes<sup>40</sup>, and/or sons and daughters have different capacities to respond to or ignore information from fathers and mothers. If this is the case, TGP may evolve at the interface between sexual conflict and parent-offspring conflict, with paternal strategies, maternal strategies, and offspring counter-adaptations all ultimately dictating offspring phenotypes. On the other hand, parents' and offspring fitness interests in the face of predation risk may be aligned; if this is the case, then sex-specific plasticity may arise because mothers and fathers experience their environment in different ways and/or because the same parental environment favors different phenotypes in sons and daughters.

Interactions between maternal effects, paternal effects, and offspring sex could be mediated via a variety of proximate mechanisms. The distinct effects of maternal and paternal experiences could reflect different proximate mechanisms that mediate the transmission of cues from mothers versus fathers to offspring (e.g., eggs versus sperm) as well as the ways in which mothers and fathers were exposed to risk. Both distinct and interactive effects could also be

mediated by epigenetic mechanisms such as parent-of-origin effects<sup>41, 42</sup> or interactions between maternal and paternal contributions (e.g. egg cytoplasm altering the effect of sperm small RNAs) during early development<sup>23, 24</sup>. Differences between sons and daughters in how they respond to parental information could be mediated via trans-acting mechanisms (e.g., regulation of genes on non-sex chromosomes by genes located on the sex chromosome<sup>12</sup>), sex-specific differences in epigenetic mechanisms, or genomic imprinting<sup>25, 43</sup>. Further, in bulls, Y-bearing and X-bearing spermatozoa have differentially expressed proteins, suggesting a mechanism by which fathers can transmit different information to sons versus daughters<sup>44</sup>. Although mothers in many species can also transmit different information to sons and daughters (e.g., via placental function and gene expression<sup>38, 39</sup>), it is unclear if mothers can transmit different information to sons and daughters in externally fertilizing species such as sticklebacks, in which mothers do not interact with their offspring post-fertilization. Future work exploring these proximate mechanisms would be fascinating for understanding the extent to which variation in parental effects is due to changes in the information encoded by parents or changes in offspring responsiveness to parental information.

Because parents can differentially allocate based on their partner's phenotype or environmental conditions experienced by their partner<sup>21, 22, 45</sup>, in most systems it is difficult to isolate the effects of direct parental exposure to an environmental cue from environmental cues that parents indirectly detect from their mate (e.g. predator-naïve fathers provide less care to offspring of predator-exposed mothers)<sup>21, 22, 45</sup>. This makes it difficult to understand whether paternal effects can be mediated via sperm alone, or to determine the influence of paternal effects in isolation of maternal effects. In this experiment, we were able to completely isolate paternal effects mediated via sperm because there was no opportunity for parents to interact pre-

fertilization or to influence offspring post-fertilization. Although our results suggest that distinct and interactive effects of maternal and paternal effects can be mediated via selective changes to information encoded in eggs and sperm alone, a fascinating direction for future work would be to consider how parental care and mate choice might ameliorate or magnify the sex-specific effects observed here.

In conclusion, we show that both the sex of the parent and the sex of the offspring are important for predicting the ways in which offspring phenotypes are altered by parental experiences. We demonstrate that paternal cues mediated via sperm seem to be just as prominent as maternal cues mediated via eggs. However, these sex-specific patterns would have been masked if we had combined cues coming from mothers and fathers (i.e. compared offspring of two predator-exposed parents to a control) or failed to isolate effects emerging in sons versus daughters. Consequently, current theoretical and empirical work seeking to understand the evolution of transgenerational plasticity would benefit from considering the conditions which favor *sex-specific* patterns of transgenerational plasticity. Further, given broad interest in understanding the consequences of transgenerational plasticity for future generations and its potential to influence adaptive evolution, future work should consider how sex-specific effects in the first generation may alter the ways in which transgenerational effects persist for multiple generations in lineage-specific and/or sex-specific ways.

## Methods

**Housing conditions.** Adult, freshwater threespined sticklebacks were collected from Putah Creek (CA, USA). This population has prickly sculpin (*Cottus asper*), which preys primarily on stickleback eggs, fry, and juveniles. The parental generation was maintained on a summer

photoperiod schedule (16 L : 8D) at  $20^{\circ} \pm 1^{\circ}\text{C}$  and fed ad libitum daily with a mix of frozen bloodworms (*Chironomus* spp.), brine shrimp (*Artemia* spp.) and Mysis shrimp.

To simulate natural conditions on the breeding grounds, where males defend nesting territories while females shoal together, we used different procedures for exposing mothers and fathers to predation risk. Mothers were housed in six groups of  $n=10$  fish per tank to mimic shoaling conditions in the wild. To simulate predation risk, we randomly assigned three tanks to a predator-exposed treatment and we used a clay model sculpin (21cm long) to chase females for 90 seconds each day; the three unexposed treatment tanks were left undisturbed (similar to Dellinger, Zhang<sup>46</sup>). Females remained in the group tanks until they become gravid, at which time they were removed from the tank and stripped of their eggs to be used for in-vitro fertilization. Mothers were chased between 16-44 days; longer exposure increased offspring length at 4.5 months, but the length of exposure did not significantly alter any other measured offspring traits (Supplementary Material).

Fathers were kept singly in 26.5L tanks (36L x 33W x 24H cm), visually isolated from the other males' tanks with opaque partitions. Each tank contained two plastic plants, a sandbox, a clay pot, and algae to encourage nest building. Once their nest was completed, predator-exposed males were chased by a model sculpin for 30 sec every other day for 11 days; control males were left undisturbed. A separate experiment confirmed that the results reported below were not produced when fathers were chased with a net (unpublished data), suggesting that changes in offspring traits are specific to predation risk and not a byproduct of, for instance, differences in activity levels due to chasing. The day after the last exposure, males were euthanized to obtain sperm for *in-vitro* fertilization. While female sticklebacks produce eggs throughout the breeding season, stickleback males produce sperm in the beginning of the

breeding season<sup>47</sup>; thus, paternal cues mediated via sperm in this experiment are likely due to modifications to mature sperm. Although mothers and fathers were exposed to risk differently, previous studies in this population suggest that exposure to predation risk for individuals who are isolated versus in groups have largely similar consequences: another experiment comparing post-fertilization paternal cues of predation risk with early life cues of predation risk found largely overlapping effects of paternal and personal experience with predation risk, despite the fact that fathers were exposed alone and offspring were exposed in family groups<sup>48</sup>.

F1 offspring were generated via *in vitro* fertilization using a split clutch design. Each female's clutch was split and fertilized with sperm from both a predator-unexposed and predator-exposed male, while each male's sperm was split and used to fertilize eggs from a predator-unexposed and predator-exposed female, ultimately resulting in 42 clutches of half-siblings (some half clutches failed to fertilize or develop). This factorial design resulted in four different types of offspring: 1) offspring of unexposed fathers and mothers (n=11 half-clutches), 2) offspring of exposed fathers and unexposed mothers (n=11 half-clutches), 3) offspring of unexposed fathers and exposed mothers (n=10 half-clutches), and 4) offspring of exposed fathers and mothers (n=10 half-clutches). We incubated fertilized eggs in a cup with a mesh bottom placed above an air bubbler and fry were reared in 37.9 L tanks (53L x 33W x 24H cm). By artificially fertilizing and incubating the eggs, we controlled for possible pre-fertilization effects mediated by interactions between mothers and fathers<sup>22, 45</sup>, as well as the post-fertilization effects mediated by paternal care<sup>49</sup>. Further, by artificially fertilizing and incubating the eggs, our experimental design controlled for the possibility that stressed parents might be less likely to successfully mate or parent offspring.



At 2.5 months, we split the five largest clutches in each of the four treatments. We gently caught individual fish in a clear bottomed cup and put 10 fish each into two 26.5L tanks. Fish in one of those 26.5L tanks were used for the behavioral assays and gene expression (see below). In the remaining clutches, 20 fish were caught and immediately returned to their tank. Offspring were switched to a winter light schedule (8 L: 16 D) prior to the predation trials, open field assays, or brain collection, but resumed a summer light schedule prior to the scototaxis assays, which were conducted when offspring were reproductively mature. Separate groups of offspring were used for each assay described below.

***Measuring survival under predation risk and ventilation rate.*** At 3-5 months of age (mean: 20.6mm standard length  $\pm$  2.1 mm s.d), groups of n=4 offspring (one from each parental treatment) were exposed to a live sculpin predator. One day prior to the predation assay, one fish from each of the four parental treatments was gently caught from their home tank, weighed, and measured; fish within a trial were size matched as much as possible (mean pairwise standard length (SL) difference among stickleback per trial: 2.06mm  $\pm$  0.90 mm s.d). We gave each fish one mark with blue, yellow, orange, or red elastomer dye (Northwest Marine Technologies) on the side of their body. To control for potential correlations between color and survival, the color was rotated among trials such that all treatments received each color for one-fourth of the trials (captures did not vary by color: Chi-squared test,  $\chi^2=3.50$ , p=0.32). After marking, each fish was transferred to a 250ml glass beaker containing 100mL of water, with opaque sides to isolate the fish. We measured opercular beats 30 seconds after transferring to the beaker as a proxy for acute stress<sup>32</sup> and 30 minutes after transferring to understand response to prolonged stress (n=100 fish per parental treatment group). At the end of thirty minutes, all four fish were moved

to the same 9.5L holding tank (32 x 21 cm and 19 cm high) until the predation trial the following day.

Sculpin used as predators in this experiment (n=4) were housed individually in 26.5L tanks (36L x 33W x 24H cm) with a bubbler, plants, and a clay pot for shelter. Each sculpin was used for a maximum of one trial per day. One hour prior to the beginning of the trial, all bubblers and plants were removed from the sculpin's tank and water was drained to the halfway point. Immediately prior to the trial, the sticklebacks were gently netted from their holding tank, placed in water in individual cups, and simultaneously transferred into the sculpin's tank as far away from the sculpin as possible. The trial commenced as soon as all four fish were in the testing tank and ended two minutes after the first fish was captured by the sculpin. We left the stickleback in the tank for up to three hours and recorded the identity of the survivors. Of the 100 trials that were conducted, 14 did not result in any successful captures and were therefore excluded from further analysis of survival data. We euthanized the survivors of the predation assays and used a section of muscle tissue to sex a large portion of the survivors (n=157 fish from 67 trials; tissue samples were not collected for the first n= 22 trials) with a male-specific genetic marker per the methods of Peichel, Ross<sup>50</sup>.

***Measuring behavior under predation risk.*** When offspring were 4.5 months, we measured behavior in an open field before and after a simulated predator attack (as in Bensky, Paitz<sup>51</sup>). Individuals were placed in an opaque refuge in the center of a circular arena (150cm diameter) divided into eight peripheral sections with a circular section in the middle. After a three minute acclimation period, we removed the plug from the refuge, measured the latency for fish to emerge, and then measured the number of different (exploration) and total (activity)

sections visited for three minutes after emergence. Fish that did not emerge from the refuge after 10 minutes were gently released from the refuge; while offspring who emerged naturally were more active/exploratory than fish who were released (generalized linear model with binomial distribution (emerged or released), with activity/exploration as a fixed effect:  $Z_{234}=-3.68$ ,  $p<0.001$ ), controlling for emergence time did not alter the significance of the results reported below.

After the 3min period, we simulated a sculpin predator attack. This attack elicited freezing behaviour from the fish; we measured the latency to resume movement after the simulated attack. Once the individual resumed movement, we again measured the number of different and total sections visited for three minutes. If the fish remained frozen for greater than five minutes ( $n=20$  fish), we ended the trial and considered activity and exploration after the simulated predation attack to be zero. Statistics were conducted on all the data, but results remain significant when these fish are omitted. We weighed and measured the fish, euthanized it via decapitation, and preserved the body in ethanol for identification of sex<sup>50</sup>. We assayed  $n=118$  fish:  $n=12$  females and  $n=18$  males with control parents,  $n=15$  females and  $n=16$  males with predator-exposed fathers,  $n=13$  females and  $n=14$  males with predator-exposed mothers, and  $n=11$  females and  $n=19$  males with two predator-exposed parents.

***Measuring anxiety/cautiousness.*** Scototaxis (light/dark preference) protocols have been developed to test anti-anxiety/cautious behavior in fish<sup>33</sup>. When offspring were between 9-13 months old, offspring were gently caught with a cup from their home tank and placed in a clear cylinder (10.5cm diameter) in the center of a half-black, half-white tank (51L x 28W x 19H cm, coated on the inside and outside with matte contact paper), filled halfway with water. After a 5-

minute acclimation period, we lifted the cylinder, and fish explored the tank for 15 minutes, during which we measured the latency to enter the white section, total time in the white section, and the number of times the fish moved between the black/white sections. The orientation of the tank was rotated between trials, and water was completely changed between each trial. On average, fish spent less time in the white portion of the tank than the black portion (mean  $\pm$  s.e.:  $208.7 \pm 18.8$  sec out of a 900 sec trial). We interpret greater activity (duration/visits) in the white portion of the tank as anti-anxiety/less cautious behavior<sup>33</sup>. After the 15-minute testing period, we removed the fish from the tank, recorded mass and standard length, euthanized the fish in an overdose of MS-222, and confirmed sex via examination of the gonads. We assayed n=162 fish: n=23 females and n=15 males with control parents, n=22 females and n=17 males with predator-exposed fathers, n=23 females and n=21 males with predator-exposed mothers, and n=24 females and n=17 males with two predator-exposed parents.

***Measuring brain gene expression.*** We dissected whole brains from 4.5 month juvenile offspring from each of the four parental treatment groups. We sampled n=2 offspring per family per treatment group (with 1 female and 1 male for most families), for n=5 male offspring and n=5 female offspring brains per parental treatment group. Offspring were captured from their home tank between 1100-1600hrs and immediately sacrificed. Brains were preserved in RNAlater, stored at 4°C overnight, and transferred to -80°C until RNA extraction. We extracted RNA using Macherey-Nagel NucleoSpin 96 kits, confirmed quality of samples via Bioanalyzer, normalized the concentration of the samples, and sent n=39 samples to the Genomic Sequencing and Analysis Facility at UT Austin for TagSeq library preparation and sequencing (one sample was of poor quality).

442

# 443 *Statistical Analysis.*

444 *Predation assays.* We used generalized linear mixed models (GLMM) with a binomial  
445 distribution (R package lme4<sup>52</sup>) to analyze differences in survival during the predation assay.  
446 We included fixed effects of maternal treatment, paternal treatment, and standard length, with  
447 random effects of maternal identity, paternal identity, sculpin identity, and test group. We tested  
448 for interactions between the fixed effects and removed all non-significant interactions.

449 *Stress-induced respiration.* Because we found evidence of heteroskedasticity in our data,  
450 we used MCMC generalized linear mixed models (R package MCMCglmm<sup>53</sup>) using a weak  
451 prior on the variance (V=1, nu=0.002). We ran models for 200,000 iterations, with a burn-in of  
452 3000 iterations, thin = 3, and Gaussian distributions (and used these same parameters in MCMC  
453 GLMM models described in other sections below). To analyze differences in stress-induced  
454 respiration (breaths/minute), we included fixed effects of maternal treatment, paternal treatment,  
455 time period (30s or 30min after being placed in beaker), and standard length to control for  
456 differences in size. We also included random effects of individual identity nested within both  
457 maternal and paternal identity, to control for repeated measures on the same individual. We  
458 tested for interactions between fixed effects and removed all non-significant interactions. We  
459 removed one extremely low outlier in the opercular beat dataset. To determine if offspring sex  
460 predicted opercular beat rate, we reran the model above on the portion of offspring where sex  
461 was known (the survivors of the predation assays, n=157 offspring); we included all fixed and  
462 random effects stated above, plus an additional fixed effect of offspring sex. To determine if  
463 opercular beat rate predicted survival in the predation assays, we used GLMMs with a binomial  
464 distribution with survival as the dependent variable, opercular beat rate (square-root transformed)

as a fixed effect, and random effects of maternal identity, paternal identity, sculpin identity, and test group. We ran separate models for opercular beat rate at 30 seconds and 30 minutes.

*Behavioral assays.* We used principal components analysis (R package factextra) to combine exploration (number of different sections visited) and activity (number of sections visited) into one principal component. Behaviors were scaled and centered, and we included activity and exploration before and after the simulated predator attack (two data points per individual). We extracted an eigenvalue of 1.79 that captured 89.3% of the variance in these two behaviors; positive values indicate more active and exploratory individuals. We also used a separate principal components analysis to combine latency to emerge from the shelter and latency to resume movement after the simulated predator attack, as these behaviors were correlated (Spearman rank correlation:  $\rho=0.19$ ,  $p=0.048$ ). We scaled and centered the behaviors, and extracted one principal component with an eigenvalue of 1.34 that captured 66.9% of the variance in these two behaviors; positive values indicate less bold individuals who took longer to emerge from the shelter and to resume movement after the simulated predator attack). We ran the second PCA independently of the first PCA because we had two data points per individual for activity and exploratory behavior (before and after the simulated predator attack) and only one data point per individual for latency to emerge and to resume movement.

To understand how parental exposure to predation risk altered behavior, length, and body mass, we used MCMC GLMMs with a Gaussian distribution. For activity/exploration, we included fixed effects of maternal treatment, paternal treatment, individual sex, standard length, and observation period (before or after the simulated predator attack), as well as random effects of ID nested within mother and father identity (separately) and observer identity. We combined

activity/exploration before and after the simulated predator attack into one model (two datapoints per individual) because we found no evidence of an interaction between maternal or paternal treatment with observation period. For emergence/freezing behavior we included fixed effects of maternal treatment, paternal treatment, individual sex, and standard length as well as random effects of mother identity, father identity, and observer identity. Finally, for models testing length and mass, we included fixed effects of maternal treatment, paternal treatment, individual sex, and random effects of maternal and paternal identity. We added an additional fixed effect of age (days since hatching) to the model testing length and an additional fixed effect of length for the model testing mass. We removed one outlier for the length dataset and one different outlier for the mass dataset. For all models, we tested for possible interactions between paternal treatment, maternal treatment, and offspring sex; we retained significant interactions.

*Scototaxis*. We used principal components analysis (R package factextra) to summarize latency to enter the white section of the tank, the total amount of time the fish spent in the white portion of the tank, and the number of times the fish switched between the black and white side of the tank. For individuals that never entered the white side of the tank (n=30 of 162 individuals), we recorded latency to enter as 900 seconds, which was the duration of the trial. Behaviors were scaled and centered and we extracted one principal component with an eigenvalue of 2.10 that captured 70.1% of the variance for behavior in the scototaxis trials; positive values were a measure of increased cautious behavior with a higher latency to enter the white section, less total time in the white section, and fewer instances of switching between the black and white sections. We then used this principal component as the dependent variable in the MCMC GLMMs, with fixed effects of maternal treatment, paternal treatment, sex, standard

length, and day, to control for any potential season effects. We also included random effects of maternal and paternal identity, as well as observer identity. We tested for interactions between these fixed effects and removed all non-significant interactions.

*TagSeq informatics.* FASTQC was used to assess the quality of the reads. Tag-seq produced an average of ~7 million reads per sample. We aligned reads to the *Gasterosteus aculeatus* reference genome (the repeat masked reference genome, Ensembl release 92), using STAR (2.5.3)<sup>54</sup>. Reads were assigned to features according to the Ensembl release 92 gene annotation file ([http://ftp.ensembl.org/pub/release-92/gtf/gasterosteus\\_aculeatus/](http://ftp.ensembl.org/pub/release-92/gtf/gasterosteus_aculeatus/)). HTSeq-Count was used to count reads mapped to gene features using stickleback genome annotation. Multimapped reads or reads mapped to non-genic location were excluded from the analysis.

*Differential gene expression.* Two samples were excluded based on high variability on multidimensional scaling (MDS) plots. We included genes with at least 0.1 cpm in 5 samples. To estimate differential expression, pairwise comparisons between control and each treatment group (offspring with just a predator-exposed mother, with just a predator-exposed father, or two predator-exposed parents) within each sex using edgeR. Count data were TMM (trimmed mean of M-values) normalized and we used a ‘glm’ approach to call differential expression between treatment groups. We adjusted actual p-values via empirical FDR, where a null distribution of p-values was determined by permuting sample labels for 500 times for each tested contrast and a false discovery rate was estimated<sup>55</sup>.

*Co-expression network analysis.* To build an unsigned weighted co-expression network,



we excluded genes with non-zero variances. Further, we excluded genes that had zero counts in at least 80% of the samples. The input counts were voom transformed using voom functionality (R package limma) and then pairwise gene-gene correlations were estimated using Pearson correlation. Based on scale free topology criterion, spurious correlations were removed by estimating appropriate soft threshold. A soft threshold of 10 with almost 90% R square was used to filter low correlations and to build adjacency (A) and topological overlap (TOM) matrices. Then using hierarchical clustering, we built a dendrogram of all genes based on TOM. This tree was cut using dynamic tree cut method as implemented in WGCNA<sup>56,57</sup> with deepSplit = 4 and minimum cluster size of 30 genes. Modules were further merged based on their similarity and their eigengenes values were saved for downstream analysis. Finally, genes with > 0.5 correlations with module eigengenes were retained as modules members.

To find modules significantly associated with treatment effects, we fitted a linear model which blocked for clutch ID as a random factor, along with main and interactive effects of sex, paternal treatment, and maternal treatment on module eigengenes using lmer test function in lmerTest package in R<sup>58</sup>. We used clutch ID for this analysis, rather than maternal and paternal identity separately, because we selected offspring from a subset of clutches and few of the clutch shared mothers or fathers. Eigengenes which were significantly associated ( $p < 0.05$ ) with either the main or interactive effects of sex, paternal treatment, and maternal treatment were retained.

**Animal welfare note.** All methods were approved by Institutional Animal Care and Use Committee of University of Illinois Urbana-Champaign (protocol ID 15077), including the use of live predators.

## 556    **Acknowledgements**

557            Thank you to Eunice Chen, Erin Hsiao, Yangxue Ma, Liam Masse, and Christian  
558    Zielinski for help with data collection and to Sarah Donelan and the Bell lab for comments on  
559    previous versions of this manuscript. This work was supported by the National Institutes of  
560    Health award number 2R01GM082937-06A1 to Alison Bell and National Institutes of Health  
561    NRSA fellowship F32GM121033 to Jennifer Hellmann.

## References

1. Andersson M. *Sexual selection*. Princeton University Press (1994).
2. Stillwell RC, Blanckenhorn WU, Teder T, Davidowitz G, Fox CW. Sex differences in phenotypic plasticity affect variation in sexual size dimorphism in insects: from physiology to evolution. *Annual review of entomology* **55**, 227-245 (2010).
3. Meuthen D, Baldauf SA, Bakker TCM, Thünken T. Neglected patterns of variation in phenotypic plasticity: age- and sex-specific antipredator plasticity in a cichlid fish. *The American Naturalist* **191**, 475-490 (2018).
4. Xu W, *et al.* Sex differences in alarm response and predation risk in the fresh water snail *Pomacea canaliculata*. *Journal of Molluscan Studies* **80**, 117-122 (2014).
5. Ceballos CP, Valenzuela N. The role of sex-specific plasticity in shaping sexual dimorphism in a long-lived vertebrate, the snapping turtle *Chelydra serpentina*. *Evolutionary Biology* **38**, 163 (2011).
6. Bonduriansky R, Head M. Maternal and paternal condition effects on offspring phenotype in *Telostylus angusticollis* (Diptera: Neriidae). *Journal of Evolutionary Biology* **20**, 2379-2388 (2007).
7. Gilad T, Scharf I. Separation between maternal and paternal effects on offspring following exposure of adult red flour beetles to two stressors. *Ecological Entomology* **44**, 494-501 (2019).
8. Bonduriansky R, Runagall-McNaull A, Crean AJ. The nutritional geometry of parental effects: maternal and paternal macronutrient consumption and offspring phenotype in a neriid fly. *Functional Ecology* **30**, 1675-1686 (2016).
9. Mueller BR, Bale TL. Early prenatal stress impact on coping strategies and learning performance is sex dependent. *Physiology & Behavior* **91**, 55-65 (2007).
10. Braithwaite EC, Murphy SE, Ramchandani PG, Hill J. Associations between biological markers of prenatal stress and infant negative emotionality are specific to sex. *Psychoneuroendocrinology* **86**, 1-7 (2017).
11. Short AK, *et al.* Elevated paternal glucocorticoid exposure alters the small noncoding RNA profile in sperm and modifies anxiety and depressive phenotypes in the offspring. *Translational Psychiatry* **6**, e837 (2016).
12. Metzger DC, Schulte PM. Maternal stress has divergent effects on gene expression patterns in the brains of male and female threespine stickleback. *Proceedings of the Royal Society B: Biological Sciences* **283**, (2016).

13. Schulz KM, *et al.* Maternal stress during pregnancy causes sex-specific alterations in offspring memory performance, social interactions, indices of anxiety, and body mass. *Physiology & behavior* **104**, 340-347 (2011).
14. Badyaev Alexander V. Maternal inheritance and rapid evolution of sexual size dimorphism: passive effects or active strategies? *The American Naturalist* **166**, S17-S30 (2005).
15. Emborski C, Mikheyev A, S. Ancestral diet transgenerationally influences offspring in a parent-of-origin and sex-specific manner. *Philosophical Transactions of the Royal Society B: Biological Sciences* **374**, 20180181 (2019).
16. McNamara JM, Dall SR, Hammerstein P, Leimar O. Detection vs. selection: integration of genetic, epigenetic and environmental cues in fluctuating environments. *Ecol Lett* **19**, 1267-1276 (2016).
17. Dall SR, McNamara JM, Leimar O. Genes as cues: phenotypic integration of genetic and epigenetic information from a Darwinian perspective. *Trends in Ecology & Evolution* **30**, 327-333 (2015).
18. Leimar O, McNamara JM. The evolution of transgenerational integration of information in heterogeneous environments. *Am Nat* **185**, E55-69 (2015).
19. Kuijper B, Hoyle RB. When to rely on maternal effects and when on phenotypic plasticity? *Evolution; International Journal of Organic Evolution* **69**, 950-968 (2015).
20. Zirbel KE, Alto BW. Maternal and paternal nutrition in a mosquito influences offspring life histories but not infection with an arbovirus. *Ecosphere* **9**, e02469 (2018).
21. Mashoodh R, Habrylo IB, Gudsnuik KM, Pelle G, Champagne FA. Maternal modulation of paternal effects on offspring development. *Proceedings of the Royal Society B: Biological Sciences* **285**, 20180118 (2018).
22. Mashoodh R, Franks B, Curley JP, Champagne FA. Paternal social enrichment effects on maternal behavior and offspring growth. *Proceedings of the National Academy of Sciences* **109**, 17232-17238 (2012).
23. Crean AJ, Bonduriansky R. What is a paternal effect? *Trends in Ecology & Evolution* **29**, 554-559 (2014).
24. Garcia-Gonzalez F, Dowling Damian K. Transgenerational effects of sexual interactions and sexual conflict: non-sires boost the fecundity of females in the following generation. *Biology Letters* **11**, 20150067 (2015).
25. Bonduriansky R, Day T. Nongenetic inheritance and its evolutionary implications. *Annual Review of Ecology, Evolution, and Systematics* **40**, 103-125 (2008).

26. Reimchen TE. Spine deficiency and polymorphism in a population of *Gasterosteus aculeatus*: an adaptation to predators? *Canadian Journal of Zoology* **58**, 1232-1244 (1980).
27. Reimchen TE, Nosil P. Ecological causes of sex-biased parasitism in threespine stickleback. *Biological Journal of the Linnean Society* **73**, 51-63 (2001).
28. Johnson S, Candolin U. Predation cost of a sexual signal in the threespine stickleback. *Behavioral Ecology* **28**, 1160-1165 (2017).
29. Candolin U. Reproduction under predation risk and the trade-off between current and future reproduction in the threespine stickleback. *Proceedings of the Royal Society B* **265**, 1171 (1998).
30. Bell MA, Foster SA. *The evolutionary biology of the threespine stickleback*. Oxford University Press (1994).
31. Reimchen TE, Nosil P. Variable predation regimes predict the evolution of sexual dimorphism in a population of threespine stickleback. *Evolution* **58**, 1274-1281 (2004).
32. Bell AM, Henderson L, Huntingford FA. Behavioral and respiratory responses to stressors in multiple populations of three-spined sticklebacks that differ in predation pressure. *Journal of Comparative Physiology B* **180**, 211-220 (2010).
33. Maximino C, Marques de Brito T, Dias CAGdM, Gouveia Jr A, Morato S. Scototaxis as anxiety-like behavior in fish. *Nature Protocols* **5**, 209 (2010).
34. Del Giudice M. Fetal programming by maternal stress: Insights from a conflict perspective. *Psychoneuroendocrinology* **37**, 1614-1629 (2012).
35. Sheriff MJ, *et al.* Integrating ecological and evolutionary context in the study of maternal stress. *Integrative and Comparative Biology* **57**, 437-449 (2017).
36. Stratmann A, Taborsky B, Blanckenhorn W. Antipredator defences of young are independently determined by genetic inheritance, maternal effects and own early experience in mouthbrooding cichlids. *Functional Ecology* **28**, 944-953 (2014).
37. Bell AM, Hellmann JK. An integrative framework for understanding the mechanisms and multigenerational consequences of transgenerational plasticity. *Annual Review of Ecology, Evolution and Systematics*, (in press).
38. Bale TL. Sex differences in prenatal epigenetic programming of stress pathways. *Stress* **14**, 348-356 (2011).

39. Glover V, Hill J. Sex differences in the programming effects of prenatal stress on psychopathology and stress responses: An evolutionary perspective. *Physiology & Behavior* **106**, 736-740 (2012).
40. Saldivar YL, Vielle-Calzada J-P, Ritchie MG, Garcia CM. Asymmetric paternal effect on offspring size linked to parent-of-origin expression of an insulin-like growth factor. *Ecology and Evolution* **7**, 4465-4474 (2017).
41. Kong A, Steinthorsdottir V, Masson G, et, al. Parental origin of sequence variants associated with complex diseases. *Nature* **462**, 868 (2009).
42. Lawson HA, Cheverud JM, Wolf JB. Genomic imprinting and parent-of-origin effects on complex traits. *Nature Reviews Genetics* **14**, 609 (2013).
43. Dunn GA, Bale TL. Maternal high-fat diet effects on third-generation female body size via the paternal lineage. *Endocrinology* **152**, 2228-2236 (2011).
44. Scott C, et al. Proteomic profile of sex-sorted bull sperm evaluated by SWATH-MS analysis. *Animal Reproduction Science* **198**, 121-128 (2018).
45. McGhee KE, Feng S, Leasure S, Bell AM. A female's past experience with predators affects male courtship and the care her offspring will receive from their father. *Proceedings of the Royal Society B* **282**, (2015).
46. Dellinger M, Zhang W, Bell AM, Hellmann JK. Do male sticklebacks use visual and/or olfactory cues to assess a potential mate's history with predation risk? *Animal Behaviour* **145**, 151-159 (2018).
47. Borg B. Seasonal effects of photoperiod and temperature on spermatogenesis and male secondary sexual characters in the three-spined stickleback, *Gasterosteus aculeatus* L. *Canadian Journal of Zoology* **60**, 3377-3386 (1982).
48. Stein LR, Bukhari SA, Bell AM. Personal and transgenerational cues are nonadditive at the phenotypic and molecular level. *Nature Ecology & Evolution* **2**, 1306-1311 (2018).
49. Stein LR, Bell AM. Paternal programming in sticklebacks. *Animal Behaviour* **95**, 165-171 (2014).
50. Peichel CL, et al. The master sex-determination locus in threespine sticklebacks is on a nascent Y chromosome. *Current Biology* **14**, 1416-1424 (2004).
51. Bensky MK, Paitz R, Pereira L, Bell AM. Testing the predictions of coping styles theory in threespined sticklebacks. *Behavioural Processes* **136**, 1-10 (2017).
52. Bates D, Mächler M, Bolker B, Walker S. Fitting linear mixed-effects models using lme4. *Journal of Statistical Software; Vol 1, Issue 1* (2015), (2015).

53. Hadfield JD. MCMC methods for multi-response generalized linear mixed models: the MCMCglmm R package. *Journal of Statistical Software* **1**, 1-22 (2010).
54. Dobin A, *et al.* STAR: ultrafast universal RNA-seq aligner. *Bioinformatics (Oxford, England)* **29**, 15-21 (2013).
55. Storey JD, Tibshirani R. Statistical significance for genomewide studies. *Proceedings of the National Academy of Sciences* **100**, 9440 (2003).
56. Langfelder P, Horvath S. WGCNA: an R package for weighted correlation network analysis. *BMC Bioinformatics* **9**, 559 (2008).
57. Zhang B, Horvath S. A general framework for weighted gene co-expression network analysis. In: *Statistical Applications in Genetics and Molecular Biology* (ed<sup>^</sup>(eds) (2005).
58. Kuznetsova A, Brockhoff P, Christensen R. lmerTest package: tests in linear mixed effects models. *Journal of Statistical Software* **82**, 1-26 (2017).

**Table 1:** Results of general linear mixed models (MCMCglmm) testing predictors of exploration/activity (higher values indicate more active and exploratory individuals) and boldness (higher values indicate less bold individuals, who took longer to emerge from the shelter and resume movement after the simulated predator attack). We tested fixed effects of maternal and paternal exposure to predation risk, sex, and standard length, with random effects of maternal and paternal identity. Additionally, we included observation period (before or after simulated predator attack) for activity/exploration, as well as random effects of ID nested within maternal and paternal identity. Non-significant interaction terms were removed.

|                          | <b>Activity and exploration</b>              |                      |                  |
|--------------------------|----------------------------------------------|----------------------|------------------|
|                          | <i>Mean</i>                                  | <i>95% CI (L, U)</i> | <i>P</i>         |
| Observation period       | -0.97                                        | -1.24, -0.70         | <b>&lt;0.001</b> |
| Maternal treatment       | 0.14                                         | -0.27, 0.54          | 0.48             |
| Paternal treatment       | -0.20                                        | -0.81, 0.42          | 0.52             |
| Sex                      | -0.25                                        | -0.70, 0.22          | 0.29             |
| Standard length          | -0.12                                        | -0.18, -0.05         | <b>&lt;0.001</b> |
| Paternal treatment * sex | 0.91                                         | 0.25, 1.54           | <b>0.005</b>     |
|                          | <b>Latency to emerge and resume movement</b> |                      |                  |
|                          | <i>Mean</i>                                  | <i>95% CI (L, U)</i> | <i>P</i>         |
| Maternal treatment       | 0.27                                         | -0.21, 0.73          | 0.25             |
| Paternal treatment       | -0.29                                        | -0.82, 0.25          | 0.91             |
| Sex                      | -0.45                                        | -0.87, -0.06         | <b>0.03</b>      |
| Standard length          | 0.11                                         | 0.03, 0.19           | <b>0.008</b>     |



# Figure Legends

**Figure 1:** The effects of maternal and paternal treatment on offspring in an open field assay, scototaxis assay, and survival in the face of a live predator. A) Male offspring (right) of predator-exposed fathers were significantly more exploratory and active (PCA: higher values indicate more active and exploratory individuals; mean  $\pm$  s.e.) compared to male offspring of control fathers; paternal treatment did not affect the exploratory behavior/activity of female offspring (left). The effect of paternal treatment did not depend on maternal treatment (control: grey; predator-exposed: yellow). N= 118 offspring. Stars indicate significant differences across treatment groups. B) Offspring of predator-exposed mothers were more cautious (PCA: high values indicate longer latency to enter the white area and spent less time in the white area; mean  $\pm$  s.e.) compared to offspring of control mothers. Further, female offspring (left) were more cautious than male offspring (right). The effect of maternal treatment did not depend on paternal treatment (control: grey; predator-exposed: blue). N= 162 offspring. C) In live predation trials, juvenile offspring of predator-exposed fathers, but not two predator-exposed parents, were significantly more likely to be captured and consumed by the sculpin predator relative to offspring of control fathers. Letters indicate significant differences among treatment groups, determined by Tukey's HSD with parental treatment as a 4-level variable. N= 86 trials. Within each figure, data are plotted to facilitate visualization of the statistically significant interaction terms and individual data points are shown for A and B.

**Figure 2:** Differential gene and eigen-gene expression analysis. A-B) The three circles in the Venn diagram show the number of genes that were differentially expressed in the brain of offspring of unexposed parents relative to offspring of predator-exposed mothers ("maternal"),

predator-exposed fathers (“paternal”), or two predator-exposed parents (“both”), with daughters in (A) and sons in (B). Note that relatively few genes overlap between the different pairwise comparisons. The heatmaps show the direction of gene regulation (blue: downregulated; red: upregulated) of the differentially expressed genes that are shared among the three pairwise comparisons, with daughters and sons shown separately. C) The expression profiles of the four eigen-gene modules which were significantly affected by the three-way interaction among paternal treatment, maternal treatment and offspring sex (mean  $\pm$  s.e.). N=39 offspring.

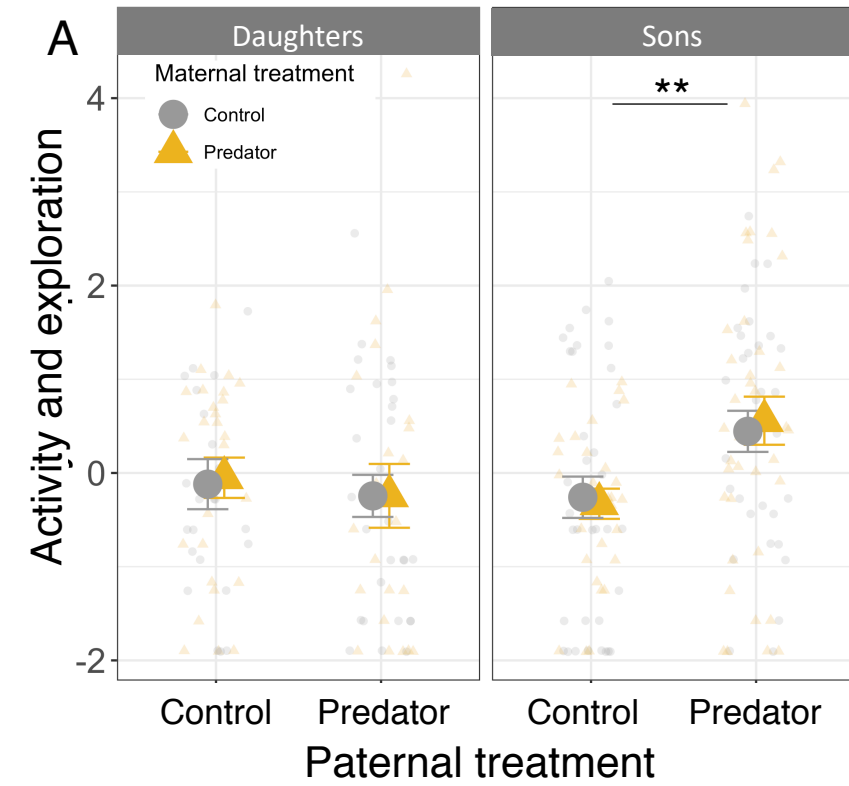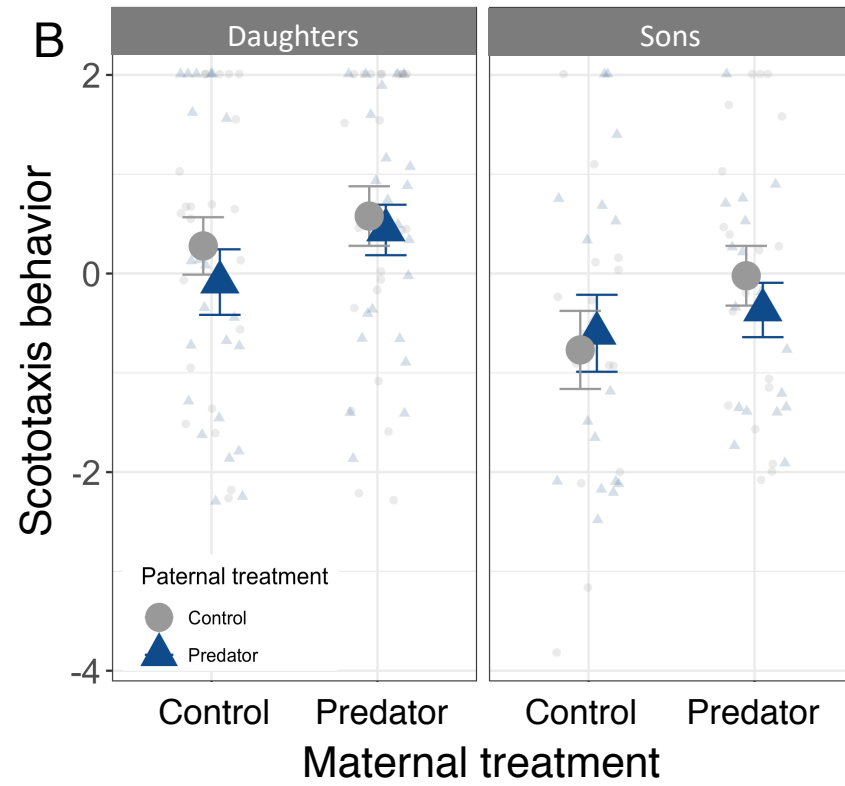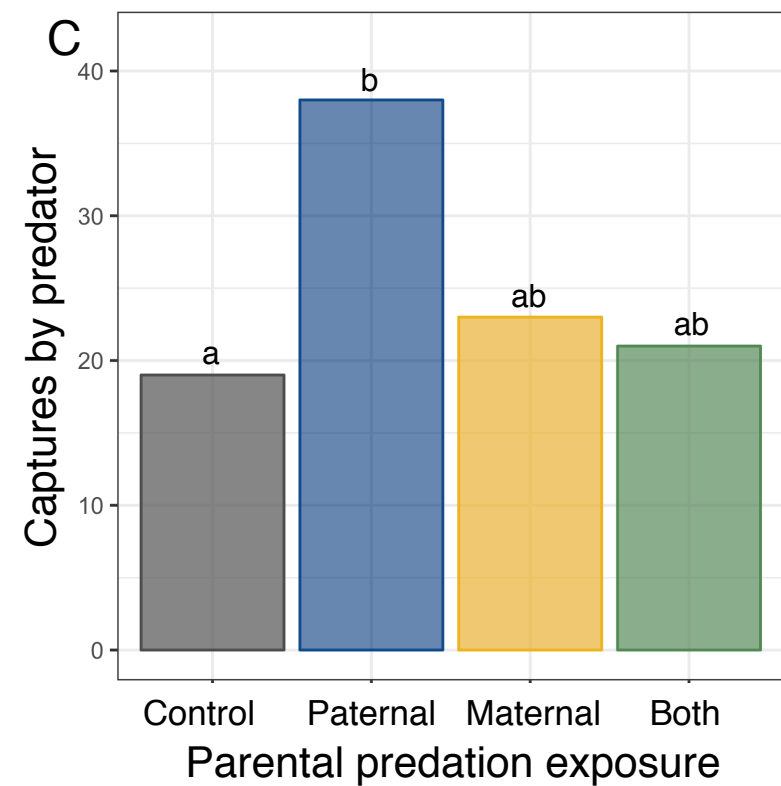

A

## Daughters

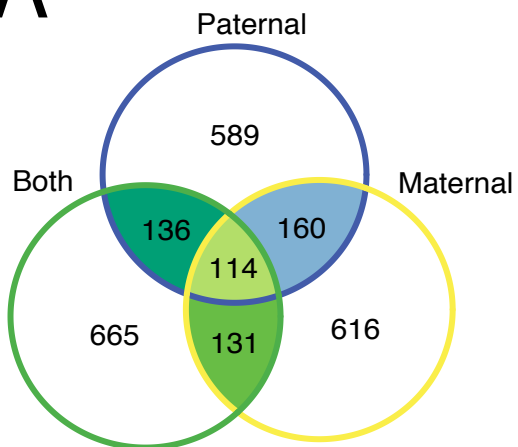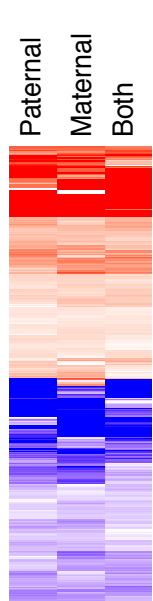

B

## Sons

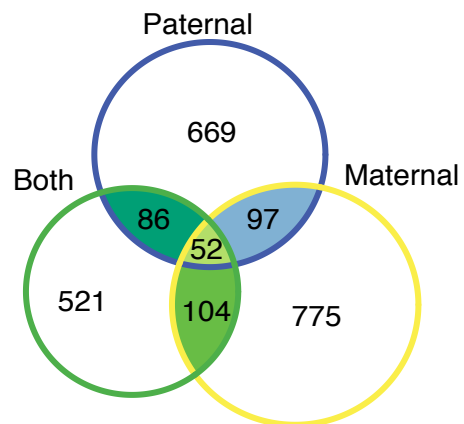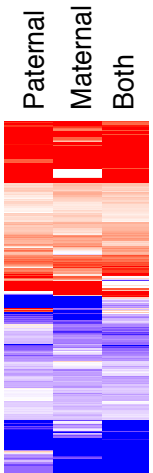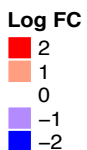

C

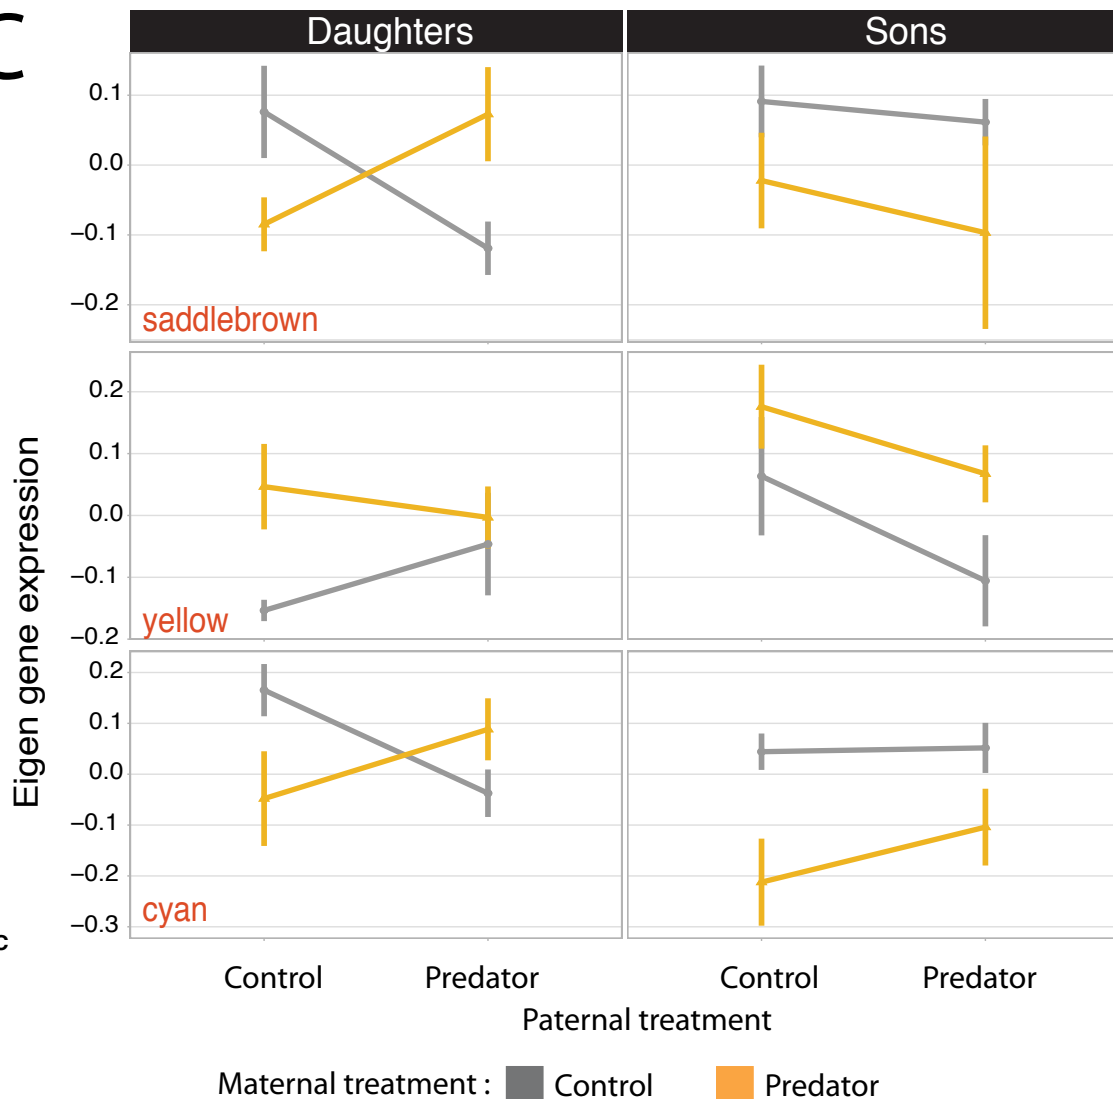

Source: https://www.biorxiv.org/content/10.1101/763862v2.full.pdf
