1 **Sex-specific transgenerational plasticity in threespined sticklebacks**

2

3 Jennifer K Hellmann <sup>1\*</sup>, Syed Abbas Bukhari <sup>1</sup>, Jack Deno <sup>1</sup>, Alison M Bell <sup>1,2,3</sup>

4

5 <sup>1</sup>Department of Evolution, Ecology and Behavior, School of Integrative Biology, University of

6 Illinois Urbana-Champaign, Urbana, Illinois, USA, 61801

7 <sup>2</sup>Carl R. Woese Institute for Genomic Biology, University of Illinois Urbana-Champaign,

8 Urbana, Illinois, USA, 61801

9 <sup>3</sup>Program in Ecology, Evolution and Conservation, University of Illinois Urbana-Champaign,

10 Urbana, Illinois, USA, 61801

11

12 \*Corresponding author: Jennifer Hellmann, 505 S Goodwin Ave, Urbana IL 61801, 215-527-

13 3572, [hellmann@illinois.edu](mailto:hellmann@illinois.edu)

## 14 Abstract

- 15 1. Transgenerational plasticity (TGP) – when parental environments alter the phenotype of  
16 future generations – can influence how organisms cope with environmental change. An  
17 intriguing, underexplored possibility is that sex –of both the parent and the offspring –  
18 plays an important role in driving the evolution of transgenerational plasticity in both  
19 adaptive and nonadaptive ways.
- 20 2. Here, we evaluate the potential for sex-specific TGP in a freshwater population of  
21 threespined sticklebacks (*Gasterosteus aculeatus*) by independently and jointly  
22 manipulating maternal and paternal experiences and separately evaluating their  
23 phenotypic effects in sons versus daughters. We tested the adaptive hypothesis that  
24 daughters are more responsive to cues from their mother, while sons are more responsive  
25 to cues from their father.
- 26 3. We exposed mothers, fathers, or both parents to visual cues of predation risk and  
27 measured offspring antipredator traits and brain gene expression.
- 28 4. Predator-exposed fathers produced sons that were more risk-prone, while predator-  
29 exposed mothers produced more anxious sons and daughters. Further, maternal and  
30 paternal effects on offspring survival were nonadditive: offspring with a predator-  
31 exposed father, but not two predator-exposed parents, had lower survival against live  
32 predators. There were also strong sex-specific effects on brain gene expression: exposing  
33 mothers versus fathers to predation risk activated different transcriptional profiles in their  
34 offspring, and sons and daughters strongly differed in the ways in which their brain gene  
35 expression profiles were influenced by parental experience.
- 36 5. We found little evidence to support the hypothesis that offspring prioritize their same-sex  
37 parent’s experience. TGP varied with both the sex of the parent and the offspring in  
38 complicated and nonadditive ways. Failing to account for these sex-specific patterns  
39 (e.g., by pooling sons and daughters) would have underestimated the magnitude of TGP.  
40 Altogether, these results draw attention to the potential for sex to influence patterns of  
41 TGP and raise new questions about the interface between transgenerational plasticity and  
42 sex-specific selective pressures, sexual conflict, and sexual selection.

- 43 **Key words:** maternal effect, paternal effect, *Gasterosteus aculeatus*, phenotypic plasticity,  
44 intergenerational plasticity, nongenetic inheritance, predation, stress

## 45 **Introduction**

46 Sex differences in life-histories (e.g. reproductive lifespan, mortality rate) or reproductive  
47 strategies can favor different optimal phenotypes in males and females (Andersson 1994).  
48 Although a shared genetic basis can constrain phenotypic differences between the sexes (Lande  
49 1980; Reeve & Fairbairn 2001), epigenetic changes can overcome this constraint and allow  
50 males and females to respond differently to the same environmental condition (within-  
51 generational plasticity). Potentially adaptive sex-specific patterns of within-generational  
52 plasticity have been documented in diverse taxa (Stillwell *et al.* 2010; Ceballos & Valenzuela  
53 2011; Xu *et al.* 2014; Meuthen *et al.* 2018); for example, in cichlids, predation risk experienced  
54 early in life influenced the development of males, but not females, possibly because males are  
55 more vulnerable to predation (Meuthen *et al.* 2018).

56 While less explored, there also is evidence for sex-specific *transgenerational* plasticity  
57 (TGP; also referred to as intergenerational plasticity or environmental parental effects);  
58 specifically, the sex of the parent and/or the offspring can alter the ways in which environments  
59 encountered by recent ancestors affect future generations. Studies and theory to date have  
60 primarily focused on the extent to which maternal experiences are integrated into offspring  
61 phenotypes; however, the biological reality is that the environment experienced by both mothers  
62 and fathers can affect future generations. For example, there is growing evidence for *paternal*  
63 effects on ecologically-important traits, which can be transmitted via paternal care as well as  
64 epigenetic changes to sperm (reviewed in (Crean & Bonduriansky 2014; Immler 2018)). Because  
65 males and females often experience different environments once they reach reproductive age and  
66 have different means of transmitting environmental cues to offspring (e.g. eggs versus sperm),  
67 the information transmitted by fathers may not match the information encoded by mothers.

68 Indeed, there is mounting empirical evidence that maternal versus paternal exposure to the same  
69 environmental condition can have different effects on offspring (Bonduriansky & Head 2007;  
70 Bonduriansky, Runagall-McNaull & Crean 2016; Gilad & Scharf 2019). Further, the influence of  
71 maternal environments might depend on paternal environments (or vice versa) (Mashoodh *et al.*  
72 2012; Mashoodh *et al.* 2018; Zirbel & Alto 2018; Gilad & Scharf 2019); for example, a recent  
73 study by Lehto and Tinghitella (2020) found that stickleback females preferred duller males  
74 when either their mother or father had encountered predation risk, but preferred brighter males  
75 when both parents had experienced predation risk. Consequently, careful experimental studies  
76 that independently and jointly manipulate maternal and paternal effects are needed to understand  
77 the proximate and ultimate causes of similarities and differences between maternal and paternal  
78 effects.

79 Parental effects also often depend on the sex of the offspring. For example, parental  
80 environments can have opposing effects on the same trait in sons compared to daughters  
81 (Mueller & Bale 2007; Short *et al.* 2016; Braithwaite *et al.* 2017) or can influence different traits  
82 in sons versus daughters (Schulz *et al.* 2011; Metzger & Schulte 2016). Because the vast  
83 majority of studies that have compared parental effects on sons and daughters have focused on  
84 maternal effects, rather than both maternal and paternal effects (but see (He *et al.* 2016;  
85 Emborski & Mikheyev 2019)), it is unclear if sex-specific offspring effects are driven by 1)  
86 differences in the magnitude of sons' versus daughters' responses to parental environments (e.g.,  
87 daughters are generally more responsive to parental stress, whether mediated by the mother or  
88 the father) or 2) how offspring attend to experiences of their same-sex versus opposite-sex  
89 parent. Offspring may attend to experiences of their same-sex parent because sex-specific  
90 differences in life history strategies or dispersal mean that daughters are more likely to encounter

91 the environments experienced by their mothers while sons are likely to encounter environmental  
92 pressures similar to their fathers. In order to evaluate the possibility that offspring selectively  
93 prioritize experiences of one parent over the other, it is necessary to compare maternal and  
94 paternal effects on both sons and daughters.

95         Sex-specific TGP might have important adaptive implications if it can resolve  
96 evolutionary conflicts that occur when selection favors different phenotypes in males and  
97 females (Bonduriansky & Day 2008). Mothers and fathers may selectively alter the phenotypes  
98 of their sons and daughters in response to the environment with a greater degree of precision than  
99 genetic inheritance and in ways that may match the distinct life-history strategies of males and  
100 females. Alternatively, sexual conflict could result in complex nonadaptive sex-dependent  
101 patterns, especially when sexual selection is strong (Burke, Nakagawa & Bonduriansky 2019).  
102 Here, we evaluate the potential for sex-specific TGP in threespined sticklebacks (*Gasterosteus*  
103 *aculeatus*). Male and female sticklebacks are sexually dimorphic in several respects, including in  
104 habitat use (Reimchen 1980), diet (Reimchen & Nosil 2001), parasite load (Reimchen & Nosil  
105 2001), and morphology (Reimchen, Steeves & Bergstrom 2016), with these differences  
106 beginning to emerge during early adulthood (Reimchen 1980; Reimchen & Nosil 2001). Sexual  
107 selection favors a variety of male-specific reproductive traits that can increase male vulnerability  
108 to predation risk (Candolin 1998; Johnson & Candolin 2017): male sticklebacks develop bright  
109 nuptial coloration, engage in conspicuous territory defense and courtship behavior, and are the  
110 sole providers of paternal care that is necessary for offspring survival (Bell & Foster 1994).  
111 These sex differences in behavior and life history often expose males and females to different  
112 predation regimes (Reimchen & Nosil 2004), likely altering the environment experienced by  
113 mothers versus fathers and the optimal phenotype for daughters versus sons in response to

114 predation risk.

115           We test the adaptive hypothesis that sex differences in life history strategies cause  
116 offspring to attend to cues from their same-sex parent: we predicted that daughters would attend  
117 to maternal cues and sons to paternal cues (i.e. a significant interaction between maternal  
118 treatment, paternal treatment, and offspring sex). To test this hypothesis, we exposed adult male  
119 and female sticklebacks to simulated predation risk prior to fertilization and used a fully factorial  
120 design to generate offspring of control (unexposed) parents, offspring of predator-exposed  
121 mothers, offspring of predator-exposed fathers, and offspring of predator-exposed mothers and  
122 fathers. Because predation risk varies in both space and time, it is likely that there is a mix of  
123 reproductively mature males and females who either have or have not recently experienced  
124 predation risk within many natural populations. We reared sons and daughters under ‘control’  
125 conditions (i.e. in the absence of predation risk) and evaluated traits relevant to predator defense.  
126 We used brain gene expression data to understand whether experiences of mothers and fathers  
127 activate different developmental programs in daughters and sons.

128

## 129 **Methods**

130 ***Housing conditions.*** Adult, sexually-mature, freshwater threespined sticklebacks were collected  
131 from Putah Creek (CA, USA). This population has prickly sculpin (*Cottus asper*), which preys  
132 primarily on stickleback eggs, fry, and juveniles. Females were housed in six groups of n=10 fish  
133 per tank to mimic shoaling conditions in the wild. To simulate predation risk, we used a clay  
134 model sculpin (21cm long) to chase females for 90 seconds each day; unexposed treatment tanks  
135 were left undisturbed (similar to Dellinger *et al.* (2018)). Gravid females were removed from  
136 tanks and stripped of their eggs for in-vitro fertilization. Mothers were chased between 16-44

137 days; longer exposure increased offspring length at 4.5 months, but the length of exposure did  
138 not significantly alter any other measured offspring traits (Supplementary Material).

139 Males were housed singly to build nests. Once their nest was completed, predator-  
140 exposed males were chased by a model sculpin for 30 sec every other day for 11 days; control  
141 males were left undisturbed. A separate experiment confirmed that the results reported below  
142 were not produced when fathers were chased with a net (unpublished data), suggesting that  
143 changes in offspring traits are specific to predation risk. The day after the last exposure, males  
144 were euthanized to obtain sperm for *in-vitro* fertilization. While female sticklebacks produce  
145 eggs throughout the breeding season, stickleback males produce sperm in the beginning of the  
146 breeding season (Borg 1982); thus, paternal experiences mediated via sperm in this experiment  
147 are likely due to modifications to mature sperm. We used a short stressor because we did not  
148 want to potentially reduce sperm quality or fertilization rates by exposing males to a stressor  
149 while developing sperm and we wanted to avoid potential habituation to predation risk  
150 (Dellinger *et al.* 2018). Further, beginning the treatment when males were transferred to a  
151 nesting arena mimics the change in predator regime that males may encounter as they move into  
152 a different habitat to nest.

153 F1 offspring were generated using a split clutch design, resulting in: 1) offspring of  
154 unexposed fathers and mothers (n=11 half-clutches), 2) offspring of exposed fathers and  
155 unexposed mothers (n=11 half-clutches), 3) offspring of unexposed fathers and exposed mothers  
156 (n=10 half-clutches), and 4) offspring of exposed fathers and mothers (n=10 half-clutches). By  
157 artificially fertilizing the eggs and incubating the embryos using an air bubbler, we controlled for  
158 possible pre-fertilization effects mediated by interactions between mothers and fathers  
159 (Mashoodh *et al.* 2012; McGhee *et al.* 2015), as well as the post-fertilization effects mediated by



160 paternal care (Stein & Bell 2014). Separate groups of offspring were used for each assay  
161 described below (see Supplementary Material for detailed methods and statistical analysis).  
162  
163 ***Measuring survival under predation risk and ventilation rate.*** At 3-5 months of age, groups of  
164 n=4 offspring (one from each parental treatment) were exposed to a live sculpin predator. One  
165 day prior to the predation assay, fish were weighed, measured, and individually transferred to a  
166 250ml opaque glass beaker containing 100mL of water. We measured opercular beats 30 seconds  
167 after transferring to the beaker as a proxy for acute stress (Bell, Henderson & Huntingford 2010)  
168 and 30 minutes after transferring to understand response to prolonged stress (n=100 fish per  
169 parental treatment group). At the end of thirty minutes, all four fish were moved to the same  
170 holding tank until the predation trial the following day. For the predation trial, sticklebacks were  
171 simultaneously transferred into the sculpin's tank (n=4 different sculpin, each used once per  
172 day); the trial ended two minutes after the first fish was captured by the sculpin. 14/100 trials did  
173 not result in any successful captures and were excluded from further analysis of survival data.  
174 We euthanized the survivors of the predation assays and used a section of muscle tissue to sex a  
175 large portion of the survivors per the methods of Peichel *et al.* (2004). We used generalized  
176 linear mixed models (GLMM) with a binomial distribution (R package lme4 (Bates *et al.* 2015))  
177 to analyze differences in survival during the predation assay. Because we found evidence of  
178 heteroskedasticity in our opercular beat data, we used MCMC generalized linear mixed models  
179 (R package MCMCglmm (Hadfield 2010)) with a weak prior on the variance ( $V=1$ ,  $\nu=0.002$ ) to  
180 analyze stress-induced respiration (breaths/minute). We ran models for 200,000 iterations, with a  
181 burn-in of 3000 iterations, thin = 3, and Gaussian distributions (and used these same parameters  
182 all MCMC models below).

183

184 ***Measuring risk taking behavior.*** When offspring were 4.5 months, we measured behavior in an  
185 open field before and after a simulated predator attack (as in Bensky *et al.* (2017)). Individuals  
186 were placed in an opaque refuge in the center of a circular arena divided into nine sections. After  
187 a three minute acclimation period, we removed the plug from the refuge, allowed fish to emerge,  
188 and then measured the number of different (exploration) and total (activity) sections visited for  
189 three minutes after emergence. We then simulated a sculpin predator attack and measured the  
190 latency to resume movement after the simulated attack. Once the individual resumed movement,  
191 we again measured the number of different and total sections visited for three minutes. We  
192 weighed and measured the fish, euthanized it via decapitation, and preserved the body in ethanol  
193 for identification of sex (Peichel *et al.* 2004). We assayed n=118 fish: n=12 females and n=18  
194 males with control parents, n=15 females and n=16 males with predator-exposed fathers, n=13  
195 females and n=14 males with predator-exposed mothers, and n=11 females and n=19 males with  
196 two predator-exposed parents.

197 We used principal components analysis (R package factextra (Kassambara & Mundt  
198 2017)) to combine exploration and activity (Spearman rank correlation:  $\rho=0.92$ ,  $p<0.001$ ), using  
199 data from both before and after the simulated predator attack (two data points per individual).  
200 We extracted an eigenvalue of 1.77 that captured 88.4% of the variance in these two behaviors;  
201 positive values indicate more active and exploratory individuals. To understand how parental  
202 exposure to predation risk altered offspring activity/exploration, length, and body mass, we used  
203 MCMC GLMMs with a Gaussian distribution; we used MCMC GLMMs with a Poisson  
204 distribution to analyze offspring freezing behavior.

205

206 **Measuring anxiety/cautiousness.** Scototaxis (light/dark preference) protocols have been  
207 developed to test anti-anxiety/cautious behavior in fish (Maximino *et al.* 2010). Fish were placed  
208 in a clear cylinder in the center of a half-black, half-white tank. After a 5-minute acclimation  
209 period, we lifted the cylinder, and fish explored the tank for 15 minutes, during which we  
210 measured the latency to enter the white section, total time in the white section, and the number of  
211 times the fish moved between the black/white sections. Principal components analysis (R  
212 package factextra) was used to combine these behaviors into one principal component  
213 (eigenvalue 2.10, captured 70.1% of the variance in behaviors). We then used this principal  
214 component as the dependent variable in the MCMC GLMMs. We interpret greater activity  
215 (duration/visits) in the white portion of the tank as anti-anxiety/cautious behavior (Maximino *et*  
216 *al.* 2010). We assayed n=162 fish: n=23 females and n=15 males with control parents, n=22  
217 females and n=17 males with predator-exposed fathers, n=23 females and n=21 males with  
218 predator-exposed mothers, and n=24 females and n=17 males with two predator-exposed parents.  
219

220 **Measuring brain gene expression.** We dissected whole brains from 4.5 month juvenile offspring  
221 (n=5 male and n=5 female offspring per treatment group) and preserved brains in RNAlater. We  
222 extracted RNA using Macherey-Nagel NucleoSpin 96 kits and sent n=39 samples to the  
223 Genomic Sequencing and Analysis Facility at UT Austin for TagSeq library preparation and  
224 sequencing (one sample was of poor quality). To estimate differential expression, pairwise  
225 comparisons between the experimental conditions (offspring with only a predator-exposed  
226 mother, offspring with only a predator-exposed father, offspring of predator-exposed mothers  
227 and fathers) relative to the control condition (offspring of unexposed parents) within each sex  
228 were made using edgeR (Robinson, McCarthy & Smyth 2010). To call differential expression,

229 we used a ‘glm’ approach and adjusted actual p-values via empirical FDR, where a null  
230 distribution of p-values was determined by permuting sample labels for 500 times for each tested  
231 contrast and a false discovery rate was estimated (Storey & Tibshirani 2003).

232 In a separate analysis, WGCNA was used to cluster genes into co-expressed gene  
233 modules (Zhang & Horvath 2005; Langfelder & Horvath 2008). To find modules significantly  
234 associated with treatment effects, we fitted a linear model (Kuznetsova, Brockhoff & Christensen  
235 2017) which blocked for clutch ID as random factor, along with main and interactive effects of  
236 sex, paternal treatment, and maternal treatment on module eigengenes. Eigengenes which were  
237 significantly associated ( $p < 0.05$ ) with either the main or interactive effects of sex, paternal  
238 treatment, and maternal treatment were retained.

239

240 ***Animal welfare note.*** All methods were approved by Institutional Animal Care and Use  
241 Committee of University of Illinois Urbana-Champaign (protocol ID 15077), including the use  
242 of live predators.

243

## 244 **Results**

### 245 ***Sons, but not daughters, of predator-exposed fathers were more active under risk***

246 In the open field assay, offspring were significantly less active/exploratory after the  
247 simulated predator attack compared to before (principal component analysis: higher values  
248 indicate more active and explorative individuals; Table 1), confirming that offspring behaviorally  
249 responded to the predator attack. There was a significant interaction between paternal treatment  
250 and offspring sex on offspring activity/exploration (Table 1; Figure 1A). Specifically, sons of  
251 predator-exposed fathers were significantly more active/exploratory compared to sons of control

252 fathers (MCMC GLMM, 95% CI in brackets here and below [-1.30, -0.20],  $p=0.01$ ), but there  
253 was not a detectable effect of paternal treatment on female offspring ([-0.40, 0.81],  $p=0.49$ ). In  
254 other words, paternal effects on activity/exploratory behavior were stronger in sons, which is  
255 consistent with our hypothesis. Greater activity in response to exposure to predation risk is  
256 consistent with higher risk-taking behavior observed in sticklebacks from high predation  
257 populations compared to low predation populations (Bell, Henderson & Huntingford 2010).

258 We did not detect significant maternal or paternal effects on freezing behavior (Table 1).  
259 We found no evidence that standard length or body mass at 4.5 months were significantly  
260 influenced by maternal (SL [1.14, 1.99],  $p=0.67$ ; mass [-0.03, 0.02],  $p=0.91$ ) or paternal (SL [-  
261 1.77, 1.38],  $p=0.78$ ; mass [-0.03, 0.03],  $p=0.96$ ) exposure to predation risk. Standard length ([-  
262 1.24, 0.35],  $p=0.25$ ), mass ([-0.003, 0.01],  $p=0.20$ ), and freezing behavior (Table 1) also did not  
263 vary between male and female offspring, although larger fish were less active/exploratory (Table  
264 1).

265

### 266 ***Both sons and daughters of predator-exposed mothers, but not fathers, were more cautious***

267 Offspring of predator-exposed mothers were more cautious (principal component  
268 analysis: took longer to enter the white area, spent less time in the white area, and switched less  
269 between black and white areas) compared to offspring of control mothers (MCMC GLMM: 95%  
270 CI [0.06, 1.09],  $p=0.03$ ; Figure 1B). However, we did not detect an effect of paternal treatment  
271 on offspring scototaxis behavior ([-0.79, 0.32],  $p=0.44$ ). Both female ([-1.27, -0.17],  $p=0.01$ )  
272 and smaller ([-0.10, -0.006],  $p=0.03$ ) offspring showed more cautious behavior. We found no  
273 evidence of seasonal effects (experimental day [-0.004, 0.01],  $p=0.33$ ). Consequently, rather than

274 offspring attending to the experiences of their same-sex parent in the scototaxis assay, we  
275 observed that both sons and daughters responded to maternal experiences.

276

277 ***Offspring of predator-exposed fathers were more vulnerable to predation, but not if their***  
278 ***mother was also exposed***

279 There was a significant interaction between maternal and paternal treatment on offspring  
280 survival in live predation assays (generalized linear mixed effect model:  $Z_{335} = -1.98, 0.047$ ).  
281 Specifically, offspring of predator-exposed fathers were more frequently captured by the  
282 predator compared to offspring of control parents (Tukey's HSD with parental treatment as a 4-  
283 factor variable:  $Z=2.72, p=0.03$ ), but this was not true for offspring of predator-exposed mothers  
284 ( $Z=0.73, p=0.88$ ) or both a predator-exposed mother and father ( $Z=-0.80, p=0.85$ ; Figure 1C).  
285 This suggests that was a strong fitness cost of having a predator-exposed father, but mothers  
286 seemed to mitigate those costs, perhaps by making their offspring more cautious (see above).  
287 Survivors of the successful predation trials were heavily female biased (93/148; Chi-squared:  
288  $\chi^2=9.76, p=0.002$ ), suggesting that males are generally more vulnerable to predation risk. The  
289 sex-bias was not significantly different across treatment groups ( $\chi^2=3.03, p=0.39$ ); this suggests  
290 that paternal exposure influenced sons and daughters equally, although we cannot conclude  
291 this definitively because we do not know the sex of the captured fish. We found no effect of size  
292 on how frequently the stickleback were captured by the predator ( $Z_{335} = 1.56, 0.11$ ).

293 We found no significant difference between stress-induced respiration rates after initial  
294 confinement or after 30 minutes of confinement (95% CI [-2.77, 3.16],  $p=0.90$ ). We did not  
295 detect significant maternal ([-4.79, 12.44],  $p=0.36$ ) or paternal effects ([-16.91, 4.05],  $p=0.20$ ) on  
296 stress-induced respiration, although larger fish tended to have lower stress-induced respiration

297 compared to smaller fish ( $[-2.24, 0.14]$ ,  $p=0.08$ ). For the portion of offspring where sex was  
298 known, we found non-significant interactions between offspring sex and paternal ( $[-17.67,$   
299  $14.83]$ ,  $p=0.89$ ) or maternal treatment ( $[-23.89, 8.77]$ ,  $p=0.37$ ), although males tended to have  
300 higher opercular beats than females (main effect of sex  $[-1.48, 25.92]$ ,  $p=0.08$ ). Individuals with  
301 lower opercular beat rate at initial confinement ( $Z_{336} = -1.92$ ,  $p=0.05$ ) and after 30 minutes of  
302 confinement ( $Z_{336} = -1.75$ ,  $p=0.08$ ) tended to be more likely to be captured by the predator.

303

### 304 *Distinct maternal and paternal effects on offspring brain gene expression*

305 To evaluate whether predation risk experienced by mothers versus fathers has different  
306 consequences for offspring development at the molecular level, we compared the baseline brain  
307 gene expression profile of offspring of unexposed parents (control) to offspring with a predator-  
308 exposed mother, a predator-exposed father, and two predator-exposed parents in male and female  
309 offspring ( $n=39$  individuals). In terms of the number of genes, maternal and paternal effects on  
310 brain gene expression were approximately equivalent in magnitude, and the genes were largely  
311 nonoverlapping (Figure 2A,B): in sons, for example, 1028 genes were differentially expressed in  
312 response to maternal experience with risk, 904 genes were differentially expressed in response to  
313 paternal experience with risk while only 253 genes were shared between them (daughters show a  
314 similar pattern, Figure 2A). This suggests that, in contrast to our prediction, the transcriptomes of  
315 sons and daughters are not more responsive to the experiences of their same-sex parent.  
316 Interestingly, there was also a large number of genes that were unique to the “both” condition,  
317 i.e. between offspring of two predator-exposed parents versus the control; these differentially  
318 expressed genes could reflect the ways in which maternal and paternal effects interact at the  
319 molecular level.

320 Of the differentially expressed genes that were shared between the pairwise comparisons,  
321 nearly all were concordantly regulated, for both sons and daughters (Figure 2A,B). This suggests  
322 that, despite the large-scale differences in brain gene expression between offspring of predator-  
323 exposed mothers and fathers, there is a core set of genes that is activated in offspring brains in  
324 response to either maternal or paternal exposure to predation risk.

325

326 ***Maternal and paternal exposure to predation risk interacted with offspring sex to influence***  
327 ***offspring brain gene expression***

328 The behavioral data suggest that sons and daughters respond to parental experience with  
329 predation risk differently, with sons, but not daughters, increasing activity/exploration in  
330 response to paternal experience with predation risk. One way that such sex-specific effects could  
331 arise is if experiences of one parent (e.g. fathers) activate a particular developmental program in  
332 one offspring sex but not the other (e.g. in sons but not daughters).

333 To bring molecular data to bear on this idea, we used WGCNA to reduce the  
334 dimensionality of the transcriptomic dataset, which allowed us to explore the potential for  
335 interactive effects of maternal treatment, paternal treatment and offspring sex on modules of  
336 genes with correlated expression patterns. WGCNA identified 23 informative clusters  
337 (“modules”) of genes with coordinated expression patterns in the dataset. The expression of eight  
338 of the 23 modules was significantly affected by at least one of the factors in the model: three  
339 modules were significantly affected by maternal treatment, two were significantly affected by the  
340 two-way interaction between maternal and paternal treatment, and three were significantly  
341 affected by the three-way interaction between paternal treatment, maternal treatment and  
342 offspring sex (shown in Figure 2C). For example, the module “saddle brown” comprises 48 co-



343 expressed genes (largely enriched for developmental processes) whose expression was  
344 influenced by the three way interaction between maternal treatment, paternal treatment and  
345 offspring sex. Specifically, daughters of a predator-exposed mother or father showed lower  
346 expression of genes in this module compared to daughters of control parents or two predator-  
347 exposed parents (Figure 2C). For sons, on the other hand, the expression of genes in this module  
348 was more strongly affected by maternal treatment. A similar pattern was observed in the yellow  
349 and cyan modules. Overall these results demonstrate that at the molecular level, daughters and  
350 sons differ in the extent to which they respond to predation risk that had been experienced by  
351 their mother, father or by both parents. However, in contrast to our overall hypothesis, there was  
352 no evidence that sons and daughters primarily attend to experiences of their same-sex parent at  
353 the molecular level.

354

## 355 **Discussion**

356 Transgenerational plasticity can allow environmental information to be delivered to  
357 offspring earlier and with potentially lower costs to offspring than developmental plasticity,  
358 which may allow offspring to develop traits during early development that help them cope with  
359 environmental change (Stratmann, Taborsky & Blanckenhorn 2014; Bell & Hellmann 2019).  
360 Unlike genetic inheritance, TGP can potentially be fine-tuned to the precise environment that  
361 both parents and offspring will encounter (Bonduriansky & Day 2008), potentially including the  
362 different environments experienced by males and females because of sex differences in life  
363 history and reproductive strategies. However, adaptive sex-specific TGP is unlikely to evolve  
364 when sexual conflict and/or sexual selection is strong (Burke et al).

365           Here, we report the results of a comprehensive comparison of maternal and paternal  
366 effects on sons and daughters. Our results illustrate the complexities of sex-specific TGP:  
367 offspring phenotypes varied depending on whether predation risk had been experienced by their  
368 mother or their father, and a parent's experience with predation risk produced different  
369 phenotypes in their sons compared to their daughters. Maternal and paternal effects in response  
370 to the same environmental factor (predation risk) were largely distinct: predator-exposed mothers  
371 produced more cautious offspring (scototaxis), while predator-exposed fathers produced sons,  
372 but not daughters, that were more active under risk (open field assays). There were also non-  
373 additive interactions between maternal and paternal effects on some offspring traits. In particular,  
374 offspring of predator-exposed fathers had reduced survival against a live predator; however,  
375 offspring of two predator-exposed parents did not have reduced survival, suggesting that  
376 maternal predation exposure may mitigate the deleterious effects of paternal predation exposure  
377 to some degree. This does not seem to arise because offspring of two predator-exposed parents  
378 more closely resemble offspring of predator-exposed mothers; instead, our brain gene expression  
379 profile results are more consistent with the hypothesis that interactions between the environments  
380 experienced by mothers and fathers result in distinct neurogenomic changes in offspring with  
381 two predator-exposed parents compared to offspring of either a predator-exposed mother or  
382 father.

383           In addition to interactions between maternal and paternal effects, we found that sons and  
384 daughters differ in their response to maternal and paternal exposure to predation risk. These sex-  
385 specific patterns emerged in our study well before offspring were reproductively mature, during  
386 a period in their life when males and females are shoaling and still occupying similar habitats  
387 (Bell & Foster 1994). In contrast to our prediction that offspring would adaptively attend to the

388 cues of their same-sex parent, these sex-specific patterns of transgenerational plasticity did not  
389 seem to emerge along a consistent male-female divide (e.g. sons attend to their father and  
390 daughters attend to their mother); instead, sons and daughters were both altered by paternal and  
391 maternal environments, but in different ways. This is consistent with Emborski and Mikheyev  
392 (2019), who found that male offspring were influenced by maternal, but not paternal, diet. These  
393 sex-specific effects may be adaptive for offspring, with differences originating in early  
394 development to allow offspring to develop phenotypes that are better matched to the different  
395 environments they will encounter later in life. For example, it is possible that increased activity  
396 under risk for sons, but not daughters, may be adaptive because high variance in male  
397 reproductive success favors males that adopt high risk, high reward behaviors to increase growth  
398 and access to resources under high predation pressure (Bell, Henderson & Huntingford 2010).  
399 Alternatively, these effects may not be adaptive, either resulting from differences in sons and  
400 daughters in their susceptibility to parental stress (Bale 2011; Glover & Hill 2012) and/or  
401 reflecting sexual conflict and sexually antagonistic selection (Burke, Nakagawa & Bonduriansky  
402 2019). Indeed, Burke, Nakagawa and Bonduriansky (2019) suggest adaptive TGP may be  
403 unlikely to arise in systems with sex-specific selection because sex-specific ecologies can result  
404 in mothers and fathers experiencing different environments and therefore, transmitting  
405 conflicting information to their offspring.

406         Our study shows that maternal and paternal predation exposure can have fitness  
407 consequences for offspring (i.e., via survival) in the lab; work is needed in a more natural context  
408 in the field to assess the fitness consequences of parental effects. For example, there are multiple  
409 steps required to avoid predation (Lima & Dill 1990; Guiden *et al.* in press); while our data  
410 suggest that offspring with predator-exposed fathers are poor at evading predators once they

411 come into contact with predators, parental experience with predation risk might alter the  
412 likelihood that offspring initially avoid coming into contact with predators. Further, offspring of  
413 predator-exposed fathers might face a trade-off between survival and reproduction, favoring  
414 high-risk, high-reward strategies that reduce survival in high predation environments, but  
415 increase reproductive success by ensuring that surviving individuals are in good breeding  
416 condition. Indeed, individuals do seem to face a trade-off in surviving predation and gaining the  
417 body size necessary for successfully reproducing, with this trade-off being stronger in males  
418 compared to females (Bell *et al.* 2011).

419         Whether the fitness interests of mothers, fathers, and offspring align or conflict has  
420 important implications for the evolution of sex-specific TGP (Burke, Nakagawa & Bonduriansky  
421 2019). When parents' and offspring fitness interests in the face of predation risk are aligned, sex-  
422 specific plasticity may arise because mothers and fathers experience their environment in  
423 different ways and/or because the same parental environment favors different phenotypes in sons  
424 and daughters. However, sex-specific TGP may arise because mothers and fathers favor different  
425 optimal offspring phenotypes (Saldivar *et al.* 2017), and/or sons and daughters have different  
426 capacities to respond to or ignore information from fathers and mothers. If this is the case, TGP  
427 may evolve at the interface between sexual conflict and parent-offspring conflict, with paternal  
428 strategies, maternal strategies, and offspring counter-adaptations all ultimately dictating  
429 offspring phenotypes. This may result in the evolution of mechanisms that allow mothers to  
430 manipulate the ways in which fathers influence offspring (e.g. via cytoplasmic contributions  
431 (Crean & Bonduriansky 2014)) or fathers to manipulate the ways in which mothers influence  
432 offspring (e.g. via ejaculate composition (Garcia-Gonzalez & Dowling Damian 2015)).

433 Interactions between maternal effects, paternal effects, and offspring sex could be  
434 mediated via a variety of proximate mechanisms. Distinct maternal and paternal effects could  
435 reflect different proximate mechanisms that mediate the transmission of cues from mothers  
436 versus fathers to offspring (e.g., egg hormones or mRNAs versus sperm small RNAs) as well as  
437 the ways in which mothers and fathers were exposed to risk. Both distinct and interactive effects  
438 could also be mediated by epigenetic mechanisms such as parent-of-origin effects (Kong *et al.*  
439 2009; Lawson, Cheverud & Wolf 2013) or interactions between maternal and paternal  
440 contributions (e.g. egg cytoplasm altering the effect of sperm small RNAs) during early  
441 development (Crean & Bonduriansky 2014; Garcia-Gonzalez & Dowling Damian 2015).  
442 Differences between sons and daughters in how they respond to parental information could be  
443 mediated via trans-acting mechanisms (e.g., regulation of genes on non-sex chromosomes by  
444 genes located on the sex chromosome (Metzger & Schulte 2016)), sex-specific differences in  
445 epigenetic mechanisms, or genomic imprinting (Bonduriansky & Day 2008; Dunn & Bale 2011).  
446 Further, in bulls, Y-bearing and X-bearing spermatozoa have differentially expressed proteins,  
447 suggesting a mechanism by which fathers can transmit different information to sons versus  
448 daughters (Scott *et al.* 2018). Although mothers in many species can also transmit different  
449 information to sons and daughters (e.g., via placental function and gene expression (Bale 2011;  
450 Glover & Hill 2012)), it is unclear if mothers can transmit different information to sons and  
451 daughters in externally fertilizing species such as sticklebacks, in which mothers do not interact  
452 with their offspring post-fertilization. Future work exploring these proximate mechanisms could  
453 help explain the extent to which variation in parental effects is due to changes in the information  
454 encoded by parents or changes in offspring responsiveness to parental information.

455           Because parents can differentially allocate based on their partner's phenotype or  
456 environmental conditions experienced by their partner (Mashoodh *et al.* 2012; McGhee *et al.*  
457 2015; Mashoodh *et al.* 2018), in most systems it is difficult to isolate the effects of direct  
458 parental exposure to an environmental cue from environmental cues that parents indirectly detect  
459 from their mate (e.g. predator-naïve fathers provide less care to offspring of predator-exposed  
460 mothers) (Mashoodh *et al.* 2012; McGhee *et al.* 2015; Mashoodh *et al.* 2018). This makes it  
461 difficult to understand whether paternal effects can be mediated via sperm alone, or to determine  
462 the influence of paternal effects in isolation of maternal effects. In this experiment, we were able  
463 to completely isolate paternal effects mediated via sperm because there was no opportunity for  
464 parents to interact pre-fertilization or to influence offspring post-fertilization. Although our  
465 results suggest that distinct and interactive effects of maternal and paternal effects can be  
466 mediated via selective changes to information encoded in eggs and sperm alone, a fascinating  
467 direction for future work would be to consider how parental care and mate choice might  
468 ameliorate or magnify the sex-specific effects observed here.

469

## 470 **Conclusions**

471           In conclusion, we show that both the sex of the parent and the sex of the offspring  
472 influence the ways in which offspring phenotypes are altered by parental experiences, although  
473 we found little evidence for the adaptive hypothesis that offspring would attend primarily to cues  
474 from their same-sex parent. We demonstrate that paternal cues mediated via sperm seem to be  
475 just as prominent as maternal cues mediated via eggs. However, these sex-specific patterns  
476 would have been masked if we had combined cues coming from mothers and fathers (i.e.  
477 compared offspring of two predator-exposed parents to a control) or failed to isolate effects

478 emerging in sons versus daughters. Consequently, theoretical and empirical work seeking to  
479 understand the evolution of transgenerational plasticity would benefit from considering the  
480 conditions which influence *sex-specific* patterns of transgenerational plasticity in both adaptive  
481 and nonadaptive ways. Further, given broad interest in understanding the consequences of  
482 transgenerational plasticity for future generations and its potential to influence adaptive  
483 evolution, future work should consider how sex-specific effects in the first generation may alter  
484 the ways in which transgenerational effects persist for multiple generations in lineage-specific  
485 and/or sex-specific ways.

486

487

488 **Acknowledgements**

489 Thank you to Eunice Chen, Erin Hsiao, Yangxue Ma, Liam Masse, and Christian  
490 Zielinski for help with data collection and to Sarah Donelan and the Bell lab for comments on  
491 previous versions of this manuscript. This work was supported by the National Institutes of  
492 Health award number 2R01GM082937-06A1 to Alison Bell and National Institutes of Health  
493 NRSA fellowship F32GM121033 to Jennifer Hellmann.

494

495 **Author contributions**

496 JKH and AMB designed the study. JKH generated offspring, conducted survival assays,  
497 collected opercular beat data, dissected brains and extracted RNA, and oversaw open field assays  
498 and offspring sexing. JD conducted scototaxis assays. SAB conducted gene expression analyses.  
499 JKH wrote the first draft of the manuscript and JKH/AMB edited the manuscript.

500

501 **Data accessibility**

502 All datasets (survival, respiration data, scototaxis, behavioral assays, lists of differentially  
503 expressed genes, read counts per sample, WGCNA) will be made publicly available on Dryad  
504 upon acceptance of this manuscript.



505 **References**

- 506 Andersson, M. (1994) *Sexual selection*. Princeton University Press, New York.
- 507 Bale, T.L. (2011) Sex differences in prenatal epigenetic programming of stress pathways. *Stress*,
- 508 **14**, 348-356.
- 509 Bates, D., Mächler, M., Bolker, B. & Walker, S. (2015) Fitting linear mixed-effects models using
- 510 lme4. *Journal of Statistical Software; Vol 1, Issue 1 (2015)*.
- 511 Bell, A.M., Dingemanse, N.J., Hankison, S.J., Langenhof, M.B. & Rollins, K. (2011) Early
- 512 exposure to nonlethal predation risk by size-selective predators increases somatic growth
- 513 and decreases size at adulthood in three-spined sticklebacks. *Journal of Evolutionary*
- 514 *Biology*, **24**, 943-953.
- 515 Bell, A.M. & Hellmann, J.K. (2019) An integrative framework for understanding the
- 516 mechanisms and multigenerational consequences of transgenerational plasticity. *Annual*
- 517 *Review of Ecology, Evolution and Systematics*, **50**, 97-118.
- 518 Bell, A.M., Henderson, L. & Huntingford, F.A. (2010) Behavioral and respiratory responses to
- 519 stressors in multiple populations of three-spined sticklebacks that differ in predation
- 520 pressure. *Journal of Comparative Physiology B*, **180**, 211-220.
- 521 Bell, M.A. & Foster, S.A. (1994) *The evolutionary biology of the threespine stickleback*. Oxford
- 522 University Press, Oxford.
- 523 Bensky, M.K., Paitz, R., Pereira, L. & Bell, A.M. (2017) Testing the predictions of coping styles
- 524 theory in threespined sticklebacks. *Behavioural Processes*, **136**, 1-10.
- 525 Bonduriansky, R. & Day, T. (2008) Nongenetic inheritance and its evolutionary implications.
- 526 *Annual Review of Ecology, Evolution, and Systematics*, **40**, 103-125.
- 527 Bonduriansky, R. & Head, M. (2007) Maternal and paternal condition effects on offspring
- 528 phenotype in *Telostylinus angusticollis* (Diptera: Neriidae). *Journal of Evolutionary*
- 529 *Biology*, **20**, 2379-2388.
- 530 Bonduriansky, R., Runagall-McNaull, A. & Crean, A.J. (2016) The nutritional geometry of
- 531 parental effects: maternal and paternal macronutrient consumption and offspring
- 532 phenotype in a neriid fly. *Functional Ecology*, **30**, 1675-1686.
- 533 Borg, B. (1982) Seasonal effects of photoperiod and temperature on spermatogenesis and male
- 534 secondary sexual characters in the three-spined stickleback, *Gasterosteus aculeatus* L.
- 535 *Canadian Journal of Zoology*, **60**, 3377-3386.
- 536 Braithwaite, E.C., Murphy, S.E., Ramchandani, P.G. & Hill, J. (2017) Associations between
- 537 biological markers of prenatal stress and infant negative emotionality are specific to sex.
- 538 *Psychoneuroendocrinology*, **86**, 1-7.
- 539 Burke, N.W., Nakagawa, S. & Bonduriansky, R. (2019) Sexual conflict explains diverse patterns
- 540 of transgenerational plasticity. *bioRxiv*, 846287.
- 541 Candolin, U. (1998) Reproduction under predation risk and the trade-off between current and
- 542 future reproduction in the threespine stickleback. *Proceedings of the Royal Society B*,
- 543 **265**, 1171.
- 544 Ceballos, C.P. & Valenzuela, N. (2011) The role of sex-specific plasticity in shaping sexual
- 545 dimorphism in a long-lived vertebrate, the snapping turtle *Chelydra serpentina*.
- 546 *Evolutionary Biology*, **38**, 163.
- 547 Crean, A.J. & Bonduriansky, R. (2014) What is a paternal effect? *Trends in Ecology &*
- 548 *Evolution*, **29**, 554-559.

- 549 Dellinger, M., Zhang, W., Bell, A.M. & Hellmann, J.K. (2018) Do male sticklebacks use visual  
550 and/or olfactory cues to assess a potential mate's history with predation risk? *Animal*  
551 *Behaviour*, **145**, 151-159.
- 552 Dunn, G.A. & Bale, T.L. (2011) Maternal high-fat diet effects on third-generation female body  
553 size via the paternal lineage. *Endocrinology*, **152**, 2228-2236.
- 554 Emborski, C. & Mikheyev, A., S. (2019) Ancestral diet transgenerationally influences offspring  
555 in a parent-of-origin and sex-specific manner. *Philosophical Transactions of the Royal*  
556 *Society B: Biological Sciences*, **374**, 20180181.
- 557 Garcia-Gonzalez, F. & Dowling Damian, K. (2015) Transgenerational effects of sexual  
558 interactions and sexual conflict: non-sires boost the fecundity of females in the following  
559 generation. *Biology Letters*, **11**, 20150067.
- 560 Gilad, T. & Scharf, I. (2019) Separation between maternal and paternal effects on offspring  
561 following exposure of adult red flour beetles to two stressors. *Ecological Entomology*, **44**,  
562 494-501.
- 563 Glover, V. & Hill, J. (2012) Sex differences in the programming effects of prenatal stress on  
564 psychopathology and stress responses: An evolutionary perspective. *Physiology &*  
565 *Behavior*, **106**, 736-740.
- 566 Guiden, P.W., Bartel, S.V., Byer, N.W., Shipley, A.A. & Orrock, J.L. (in press) Reconciling  
567 multiple forms of novelty in predator-prey interactions. *Trends in Ecology & Evolution*.
- 568 Hadfield, J.D. (2010) MCMC methods for multi-response generalized linear mixed models: the  
569 MCMCglmm R package. *Journal of statistical software*, **1**, 1-22.
- 570 He, N., Kong, Q.-Q., Wang, J.-Z., Ning, S.-F., Miao, Y.-L., Yuan, H.-J., Gong, S., Cui, X.-Z., Li,  
571 C.-Y. & Tan, J.-H. (2016) Parental life events cause behavioral difference among  
572 offspring: Adult pre-gestational restraint stress reduces anxiety across generations.  
573 *Scientific Reports*, **6**, 39497.
- 574 Immler, S. (2018) The sperm factor: paternal impact beyond genes. *Heredity*, **121**, 239-247.
- 575 Johnson, S. & Candolin, U. (2017) Predation cost of a sexual signal in the threespine stickleback.  
576 *Behavioral Ecology*, **28**, 1160-1165.
- 577 Kassambara, A. & Mundt, M. (2017) factoextra: extract and visualize the results of multivariate  
578 data analyses. R package version 1.0.5. <https://CRAN.R-project.org/package=factoextra>.
- 579 Kong, A., Steinthorsdottir, V., Masson, G., et al (2009) Parental origin of sequence variants  
580 associated with complex diseases. *Nature*, **462**, 868.
- 581 Kuznetsova, A., Brockhoff, P. & Christensen, R. (2017) lmerTest package: tests in linear mixed  
582 effects models. *Journal of statistical software*, **82**, 1-26.
- 583 Lande, R. (1980) Sexual dimorphism, sexual selection, and adaptation in polygenic characters.  
584 *Evolution*, **34**, 292-305.
- 585 Langfelder, P. & Horvath, S. (2008) WGCNA: an R package for weighted correlation network  
586 analysis. *BMC Bioinformatics*, **9**, 559.
- 587 Lawson, H.A., Cheverud, J.M. & Wolf, J.B. (2013) Genomic imprinting and parent-of-origin  
588 effects on complex traits. *Nature Reviews Genetics*, **14**, 609.
- 589 Lehto, W.R. & Tinghitella, R.M. (2020) Predator-induced maternal and paternal effects  
590 independently alter sexual selection. *Evolution*, **74**, 404-418.
- 591 Lima, S.L. & Dill, L.M. (1990) Behavioral decisions made under the risk of predation: a review  
592 and prospectus. *Canadian Journal of Zoology*, **68**, 619-640.

- 593 Mashoodh, R., Franks, B., Curley, J.P. & Champagne, F.A. (2012) Paternal social enrichment  
594 effects on maternal behavior and offspring growth. *Proceedings of the National Academy*  
595 *of Sciences*, **109**, 17232-17238.
- 596 Mashoodh, R., Habrylo, I.B., Gudsnuk, K.M., Pelle, G. & Champagne, F.A. (2018) Maternal  
597 modulation of paternal effects on offspring development. *Proceedings of the Royal*  
598 *Society B*, **285**, 20180118.
- 599 Maximino, C., Marques de Brito, T., Dias, C.A.G.d.M., Gouveia Jr, A. & Morato, S. (2010)  
600 Scototaxis as anxiety-like behavior in fish. *Nature Protocols*, **5**, 209.
- 601 McGhee, K.E., Feng, S., Leasure, S. & Bell, A.M. (2015) A female's past experience with  
602 predators affects male courtship and the care her offspring will receive from their father.  
603 *Proceedings of the Royal Society B*, **282**.
- 604 Metzger, D.C. & Schulte, P.M. (2016) Maternal stress has divergent effects on gene expression  
605 patterns in the brains of male and female threespine stickleback. *Proceedings of the Royal*  
606 *Society B*, **283**.
- 607 Meuthen, D., Baldauf, S.A., Bakker, T.C.M. & Thünken, T. (2018) Neglected patterns of  
608 variation in phenotypic plasticity: age- and sex-specific antipredator plasticity in a cichlid  
609 fish. *The American Naturalist*, **191**, 475-490.
- 610 Mueller, B.R. & Bale, T.L. (2007) Early prenatal stress impact on coping strategies and learning  
611 performance is sex dependent. *Physiology & Behavior*, **91**, 55-65.
- 612 Peichel, C.L., Ross, J.A., Matson, C.K., Dickson, M., Grimwood, J., Schmutz, J., Myers, R.M.,  
613 Mori, S., Schluter, D. & Kingsley, D.M. (2004) The master sex-determination locus in  
614 threespine sticklebacks is on a nascent Y chromosome. *Current Biology*, **14**, 1416-1424.
- 615 Reeve, J.P. & Fairbairn, D.J. (2001) Predicting the evolution of sexual size dimorphism. *Journal*  
616 *of Evolutionary Biology*, **14**, 244-254.
- 617 Reimchen, T.E. (1980) Spine deficiency and polymorphism in a population of *Gasterosteus*  
618 *aculeatus*: an adaptation to predators? *Canadian Journal of Zoology*, **58**, 1232-1244.
- 619 Reimchen, T.E. & Nosil, P. (2001) Ecological causes of sex-biased parasitism in threespine  
620 stickleback. *Biological Journal of the Linnean Society*, **73**, 51-63.
- 621 Reimchen, T.E. & Nosil, P. (2004) Variable predation regimes predict the evolution of sexual  
622 dimorphism in a population of threespine stickleback. *Evolution*, **58**, 1274-1281.
- 623 Reimchen, T.E., Steeves, D. & Bergstrom, C.A. (2016) Sex matters for defence and trophic traits  
624 of threespine stickleback. *Evolutionary Ecology Research*, **17**, 459-485.
- 625 Robinson, M.D., McCarthy, D.J. & Smyth, G.K. (2010) edgeR: a Bioconductor package for  
626 differential expression analysis of digital gene expression data. *Bioinformatics*, **26**, 139-  
627 140.
- 628 Saldivar, Y.L., Vielle-Calzada, J.-P., Ritchie, M.G. & Garcia, C.M. (2017) Asymmetric paternal  
629 effect on offspring size linked to parent-of-origin expression of an insulin-like growth  
630 factor. *Ecology and Evolution*, **7**, 4465-4474.
- 631 Schulz, K.M., Pearson, J.N., Neeley, E.W., Berger, R., Leonard, S., Adams, C.E. & Stevens,  
632 K.E. (2011) Maternal stress during pregnancy causes sex-specific alterations in offspring  
633 memory performance, social interactions, indices of anxiety, and body mass. *Physiology*  
634 *& Behavior*, **104**, 340-347.
- 635 Scott, C., de Souza, F.F., Aristizabal, V.H.V., Hethrington, L., Krisp, C., Molloy, M., Baker,  
636 M.A. & Dell'Aqua, J.A. (2018) Proteomic profile of sex-sorted bull sperm evaluated by  
637 SWATH-MS analysis. *Animal Reproduction Science*, **198**, 121-128.

- 638 Short, A.K., Fennell, K.A., Perreau, V.M., Fox, A., O'Bryan, M.K., Kim, J.H., Bredy, T.W.,  
639 Pang, T.Y. & Hannan, A.J. (2016) Elevated paternal glucocorticoid exposure alters the  
640 small noncoding RNA profile in sperm and modifies anxiety and depressive phenotypes  
641 in the offspring. *Translational Psychiatry*, **6**, e837.
- 642 Stein, L.R. & Bell, A.M. (2014) Paternal programming in sticklebacks. *Animal Behaviour*, **95**,  
643 165-171.
- 644 Stillwell, R.C., Blanckenhorn, W.U., Teder, T., Davidowitz, G. & Fox, C.W. (2010) Sex  
645 differences in phenotypic plasticity affect variation in sexual size dimorphism in insects:  
646 from physiology to evolution. *Annual Review of Entomology*, **55**, 227-245.
- 647 Storey, J.D. & Tibshirani, R. (2003) Statistical significance for genomewide studies.  
648 *Proceedings of the National Academy of Sciences*, **100**, 9440.
- 649 Stratmann, A., Taborsky, B. & Blanckenhorn, W. (2014) Antipredator defences of young are  
650 independently determined by genetic inheritance, maternal effects and own early  
651 experience in mouthbrooding cichlids. *Functional Ecology*, **28**, 944-953.
- 652 Xu, W., Zhang, J., Du, S., Dai, Q., Zhang, W., Luo, M. & Zhao, B. (2014) Sex differences in  
653 alarm response and predation risk in the fresh water snail *Pomacea canaliculata*. *Journal*  
654 *of Molluscan Studies*, **80**, 117-122.
- 655 Zhang, B. & Horvath, S. (2005) A general framework for weighted gene co-expression network  
656 analysis. *Statistical Applications in Genetics and Molecular Biology*.
- 657 Zirbel, K.E. & Alto, B.W. (2018) Maternal and paternal nutrition in a mosquito influences  
658 offspring life histories but not infection with an arbovirus. *Ecosphere*, **9**, e02469.  
659

660 **Table 1:** Results of general linear mixed models (MCMCglmm) testing predictors of  
 661 exploration/activity (higher values indicate more active and exploratory individuals) and freezing  
 662 behavior. We tested fixed effects of maternal and paternal exposure to predation risk, sex, and  
 663 standard length, with random effects of maternal and paternal identity. Additionally, we included  
 664 observation period (before or after simulated predator attack) for activity/exploration, as well as  
 665 random effects of ID nested within maternal and paternal identity. Non-significant interaction  
 666 terms were removed.

667  
 668  
 669

|                          | <b>Activity and exploration</b> |                      |                  |
|--------------------------|---------------------------------|----------------------|------------------|
|                          | <i>Mean</i>                     | <i>95% CI (L, U)</i> | <i>P</i>         |
| Observation period       | -0.97                           | -1.24, -0.70         | <b>&lt;0.001</b> |
| Maternal treatment       | 0.14                            | -0.27, 0.54          | 0.48             |
| Paternal treatment       | -0.20                           | -0.81, 0.42          | 0.52             |
| Offspring sex            | -0.25                           | -0.70, 0.22          | 0.29             |
| Standard length          | -0.12                           | -0.18, -0.05         | <b>&lt;0.001</b> |
| Paternal treatment * sex | 0.91                            | 0.25, 1.54           | <b>0.005</b>     |
|                          | <b>Freezing behavior</b>        |                      |                  |
|                          | <i>Mean</i>                     | <i>95% CI (L, U)</i> | <i>P</i>         |
| Maternal treatment       | 0.31                            | -0.15, 0.80          | 0.19             |
| Paternal treatment       | -0.17                           | -0.65, 0.31          | 0.47             |
| Offspring sex            | -0.36                           | -0.78, 0.07          | 0.09             |
| Standard length          | 0.06                            | -0.02, 0.15          | 0.14             |

670 **Figures**

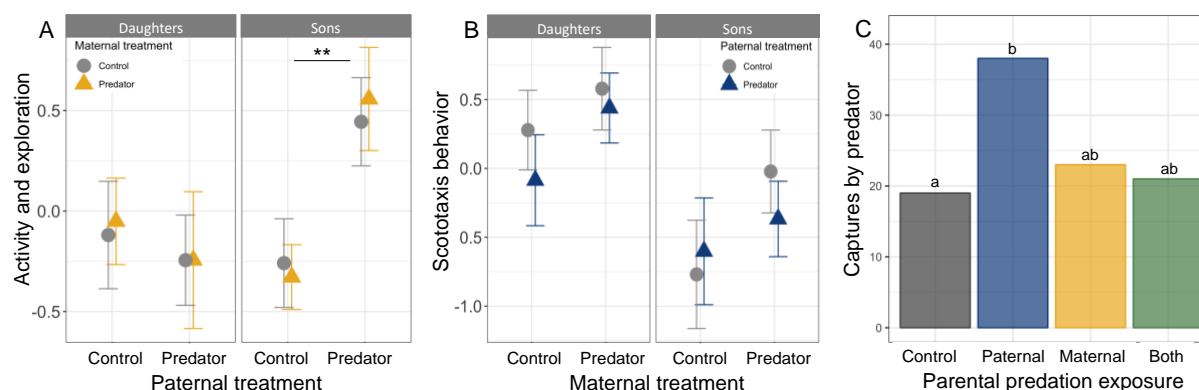

671

672 **Figure 1:** The effects of maternal and paternal treatment on offspring in an open field assay,  
673 scototaxis assay, and survival in the face of a live predator. A) Male offspring (right) of predator-  
674 exposed fathers were significantly more exploratory and active (PCA: higher values indicate  
675 more active and exploratory individuals; mean  $\pm$  s.e.) compared to male offspring of control  
676 fathers; paternal treatment did not affect the exploratory behavior/activity of female offspring  
677 (left). The effect of paternal treatment did not depend on maternal treatment (control: grey;  
678 predator-exposed: yellow). N= 118 offspring. Stars indicate significant differences across  
679 treatment groups. B) Offspring of predator-exposed mothers were more cautious (PCA: high  
680 values indicate longer latency to enter the white area and spent less time in the white area; mean  
681  $\pm$  s.e.) compared to offspring of control mothers. Further, female offspring (left) were more  
682 cautious than male offspring (right). The effect of maternal treatment did not depend on paternal  
683 treatment (control: grey; predator-exposed: blue). N= 162 offspring. C) In live predation trials,  
684 juvenile offspring of predator-exposed fathers, but not two predator-exposed parents, were  
685 significantly more likely to be captured and consumed by the sculpin predator relative to  
686 offspring of control fathers. Letters indicate significant differences among treatment groups,  
687 determined by Tukey's HSD with parental treatment as a 4-level variable. N= 86 trials.

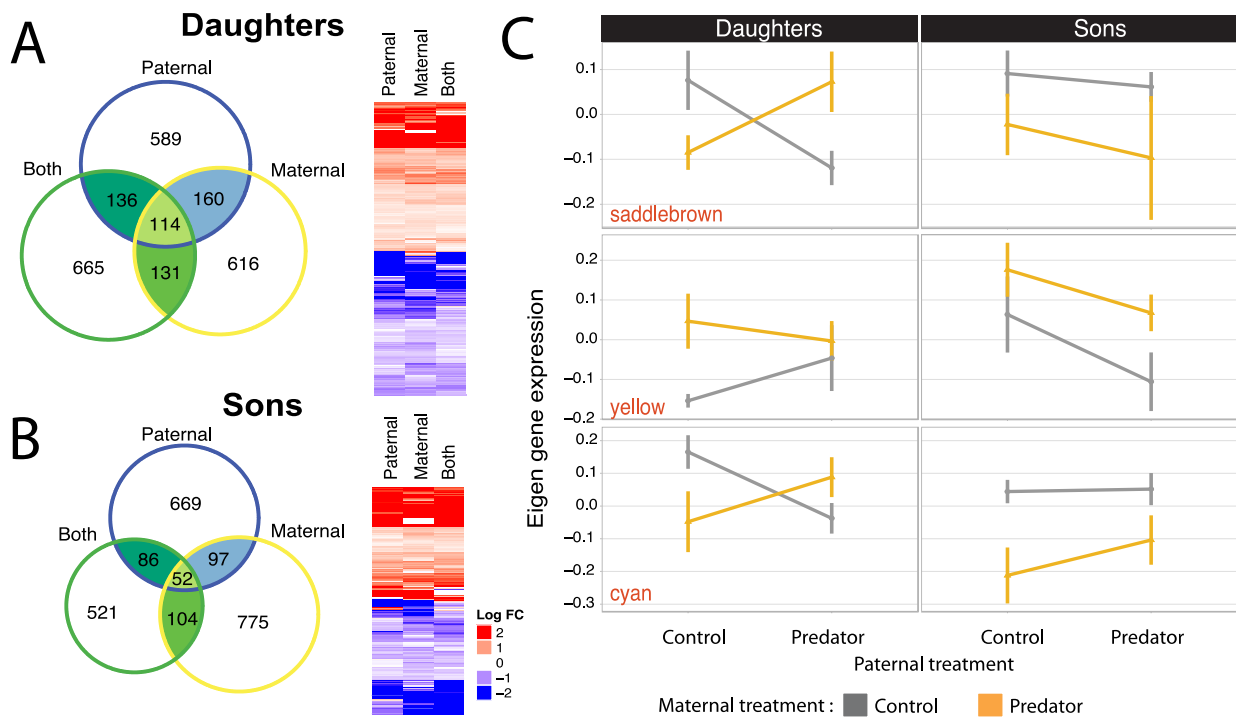

688

689 **Figure 2:** Differential gene and eigen-gene expression analysis. A-B) The three circles in the  
 690 Venn diagram show the number of genes that were differentially expressed in the brain of  
 691 offspring of unexposed parents relative to offspring of predator-exposed mothers (“maternal”),  
 692 predator-exposed fathers (“paternal”), or two predator-exposed parents (“both”), with daughters  
 693 in (A) and sons in (B). Note that relatively few genes overlap between the different pairwise  
 694 comparisons. The heatmaps show the direction of gene regulation (blue: downregulated; red:  
 695 upregulated) of the differentially expressed genes that are shared among the three pairwise  
 696 comparisons, with daughters and sons shown separately. C) The expression profiles of the four  
 697 eigen-gene modules which were significantly affected by the three-way interaction among  
 698 paternal treatment, maternal treatment and offspring sex (mean  $\pm$  s.e.). N=39 offspring.

699
